# Supplementary material for: Linking Brain Circuitry and Neural Plasticity in Antidepressant Response: The mPFC-Reuniens-Hippocampus Pathway.
Source: Research Square preprint supplement (doi:10.21203/rs.3.rs-6348176/v1), 2025-04-03
Supplement: Supplementary file 1 [file 08b28070bb84fac8146157aa.xlsx]

## Sheet: Supplementary Fig. 1a
mRNA expression - mPFC - DREADDs - Acute
cFos
mRNA expression (normalized to ApoE; GAPDH)
Saline	C21
1.14	0.562
0.871	0.664
0.827	0.58
1.162	1.103
0.932	0.964
	1.153
Group	Mean	± SEM	n	Statistics	F test (variance)	t value	P value	Replication
Saline	0.9864	0.06932	5	Two-tailed Student's t test	F(5,4) = 2.983, P=0.3120	t=1.093	P=0.3028	Two cohorts of males and females mixed
C21	0.8377	0.1093	6
mRNA expression - mPFC - Acute
Homer1a
mRNA expression (normalized to ApoE; GAPDH)
Saline	C21
0.77	0.606
1.024	1.034
1.239	1.26
0.966	1.12
0.966	1.47
0.994	1.26
Group	Mean	± SEM	n	Statistics	F test (variance)	t value	P value	Replication
Saline	0.9932	0.06128	6	Two-tailed Student's t test	F(5,5) = 3.845, P=0.1657	t=0.9774	P=0.3514	Two cohorts of males and females mixed
C21	1125	0.1202	6
mRNA expression - mPFC - Acute
NPAS4
mRNA expression (normalized to ApoE; GAPDH)
Saline	C21
1.234	0.697
0.84	0.808
0.905	0.642
1.021	0.974
1.336	1.129
0.899	0.897
Group	Mean	± SEM	n	Statistics	F test (variance)	t value	P value	Replication
Saline	1039	0.08240	6	Two-tailed Student's t test	F(5,5) = 1.246, P=0.8152	t=1.639	P=0.1322	Two cohorts of males and females mixed
C21	0.8578	0.07382	6
mRNA expression - mPFC - Acute
Arc
mRNA expression (normalized to ApoE; GAPDH)
Saline	C21
0.902	0.497
1.105	0.83
0.9	0.684
1.093	0.87
0.871	1.123
1.193	1.095
Group	Mean	± SEM	n	Statistics	F test (variance)	t value	P value	Replication
Saline	1011	0.05552	6	Two-tailed Student's t test	F(5,5) = 3.109, P=0.2388	t=1.429	P=0.1835	Two cohorts of males and females mixed
C21	0.8498	0.09790	6

## Sheet: Supplementary Fig. 1b
mRNA expression - mPFC - Acute - control WT
cFos
mRNA expression (normalized to ApoE; GAPDH)
Saline	C21
1.14	0.562
0.871	0.664
0.827	0.58
1.162	1.103
0.932	0.964
	1.153
Group	Mean	± SEM	n	Statistics	F test (variance)	t value	P value	Replication
Saline	0.9864	0.06932	5	Two-tailed Student's t test	F(5,4) = 2.983, P=0.3120	t=1.093	P=0.3028	Two cohorts of males and females mixed
C21	0.8377	0.1093	6
mRNA expression - mPFC - Acute
Homer1a
mRNA expression (normalized to ApoE; GAPDH)
Saline	C21
0.77	0.606
1.024	1.034
1.239	1.26
0.966	1.12
0.966	1.47
0.994	1.26
Group	Mean	± SEM	n	Statistics	F test (variance)	t value	P value	Replication
Saline	0.9932	0.06128	6	Two-tailed Student's t test	F(5,5) = 3.845, P=0.1657	t=0.9774	P=0.3514	Two cohorts of males and females mixed
C21	1125	0.1202	6
mRNA expression - mPFC - Acute
NPAS4
mRNA expression (normalized to ApoE; GAPDH)
Saline	C21
1.234	0.697
0.84	0.808
0.905	0.642
1.021	0.974
1.336	1.129
0.899	0.897
Group	Mean	± SEM	n	Statistics	F test (variance)	t value	P value	Replication
Saline	1039	0.08240	6	Two-tailed Student's t test	F(5,5) = 1.246, P=0.8152	t=1.639	P=0.1322	Two cohorts of males and females mixed
C21	0.8578	0.07382	6
mRNA expression - mPFC - Acute
Arc
mRNA expression (normalized to ApoE; GAPDH)
Saline	C21
0.902	0.497
1.105	0.83
0.9	0.684
1.093	0.87
0.871	1.123
1.193	1.095
Group	Mean	± SEM	n	Statistics	F test (variance)	t value	P value	Replication
Saline	1011	0.05552	6	Two-tailed Student's t test	F(5,5) = 3.109, P=0.2388	t=1.429	P=0.1835	Two cohorts of males and females mixed
C21	0.8498	0.09790	6

## Sheet: Supplementary Fig. 1c
mRNA expression - mPFC - DREADDs Overnight
cFos
mRNA expression (normalized to ApoE; GAPDH)
hM3Dq	hM3Dq + C21
1.06695	1.68414
1.0962	2.16686
1.45951	1.38352
0.791939	1.65101
0.801569	2.28079
0.783834	1.4404
Group	Mean	± SEM	n	Statistics	F test (variance)	t value	P value	Replication
hm3Dq	1000	0.1087	6	Two-tailed Student's t test	F(5,5) = 1.970, P=0.4747	t=4.100, df=10	P=0.0021	Two cohorts of males and females mixed
hM3Dq + C21	1768	0.1525	6
mRNA expression - mPFC - Overnight
Homer1a
mRNA expression (normalized to ApoE; GAPDH)
hM3Dq	hM3Dq + C21
0.444067	3.60901
1.02304	1.59593
1.22903	2.16399
1.06907	5.30358
1.31844	5.36989
0.916355	1.74018
Group	Mean	± SEM	n	Statistics	F test (variance)	t value	P value	Replication
hm3Dq	1000	0.1259	6	Two-tailed Welch's t test	F(5,5) = 31.61, P=0.0017	t=3.196, df=5.316	P=0.0221	Two cohorts of males and females mixed
hM3Dq + C21	3297	0.7076	6
mRNA expression - mPFC - Overnight
NPAS4
mRNA expression (normalized to ApoE; GAPDH)
hM3Dq	hM3Dq + C21
0.960266	1.66932
0.96332	1.24147
0.985209	1.26256
1.00279	1.47056
1.03633	1.67313
1.05208	1.22645
Group	Mean	± SEM	n	Statistics	F test (variance)	t value	P value	Replication
hm3Dq	1000	0.01547	6	Two-tailed Welch's t test	F(5,5) = 31.02, P=0.0018	t=4.841, df=5.322	P=0.0040	Two cohorts of males and females mixed
hM3Dq + C21	1424	0.08618	6
mRNA expression - mPFC - Overnight
Arc
mRNA expression (normalized to ApoE; GAPDH)
hM3Dq	hM3Dq + C21
0.908632	3.19591
1.58343	4.14275
1.02732	2.47653
0.897165	3.08086
0.796023	2.97836
0.787426	2.32762
Group	Mean	± SEM	n	Statistics	F test (variance)	t value	P value	Replication
hm3Dq	1000	0.1220	6	Two-tailed Student's t test	F(5,5) = 4.634, P=0.1178	t=7.020, df=10	P=<0.0001	Two cohorts of males and females mixed
hM3Dq + C21	3034	0.2627	6

## Sheet: Supplementary Fig. 1d
mRNA expression - mPFC - DREADDs control Overnight
cFos
mRNA expression (normalized to ApoE; GAPDH)
hM3Dq	hM3Dq + C21
1.06695	1.68414
1.0962	2.16686
1.45951	1.38352
0.791939	1.65101
0.801569	2.28079
0.783834	1.4404
Group	Mean	± SEM	n	Statistics	F test (variance)	t value	P value	Replication
hm3Dq	1000	0.1087	6	Two-tailed Student's t test	F(5,5) = 1.970, P=0.4747	t=4.100, df=10	P=0.0021	Two cohorts of males and females mixed
hM3Dq + C21	1768	0.1525	6
mRNA expression - mPFC - Overnight
Homer1a
mRNA expression (normalized to ApoE; GAPDH)
hM3Dq	hM3Dq + C21
0.444067	3.60901
1.02304	1.59593
1.22903	2.16399
1.06907	5.30358
1.31844	5.36989
0.916355	1.74018
Group	Mean	± SEM	n	Statistics	F test (variance)	t value	P value	Replication
hm3Dq	1000	0.1259	6	Two-tailed Welch's t test	F(5,5) = 31.61, P=0.0017	t=3.196, df=5.316	P=0.0221	Two cohorts of males and females mixed
hM3Dq + C21	3297	0.7076	6
mRNA expression - mPFC - Overnight
NPAS4
mRNA expression (normalized to ApoE; GAPDH)
hM3Dq	hM3Dq + C21
0.960266	1.66932
0.96332	1.24147
0.985209	1.26256
1.00279	1.47056
1.03633	1.67313
1.05208	1.22645
Group	Mean	± SEM	n	Statistics	F test (variance)	t value	P value	Replication
hm3Dq	1000	0.01547	6	Two-tailed Welch's t test	F(5,5) = 31.02, P=0.0018	t=4.841, df=5.322	P=0.0040	Two cohorts of males and females mixed
hM3Dq + C21	1424	0.08618	6
mRNA expression - mPFC - Overnight
Arc
mRNA expression (normalized to ApoE; GAPDH)
hM3Dq	hM3Dq + C21
0.908632	3.19591
1.58343	4.14275
1.02732	2.47653
0.897165	3.08086
0.796023	2.97836
0.787426	2.32762
Group	Mean	± SEM	n	Statistics	F test (variance)	t value	P value	Replication
hm3Dq	1000	0.1220	6	Two-tailed Student's t test	F(5,5) = 4.634, P=0.1178	t=7.020, df=10	P=<0.0001	Two cohorts of males and females mixed
hM3Dq + C21	3034	0.2627	6
