# Supplementary material for: Linking Brain Circuitry and Neural Plasticity in Antidepressant Response: The mPFC-Reuniens-Hippocampus Pathway.
Source: Research Square preprint supplement (doi:10.21203/rs.3.rs-6348176/v1), 2025-04-03
Supplement: Supplementary file 1 [file 45fcf30ef313ac0dcb092262.pdf]

Supplementary Data for  
**Linking Brain Circuitry and Neural Plasticity in Antidepressant Response: The mPFC-  
Reuniens-Hippocampus Pathway.**

Veleanu et al.

**Includes :**

Supplementary Figures 1-7

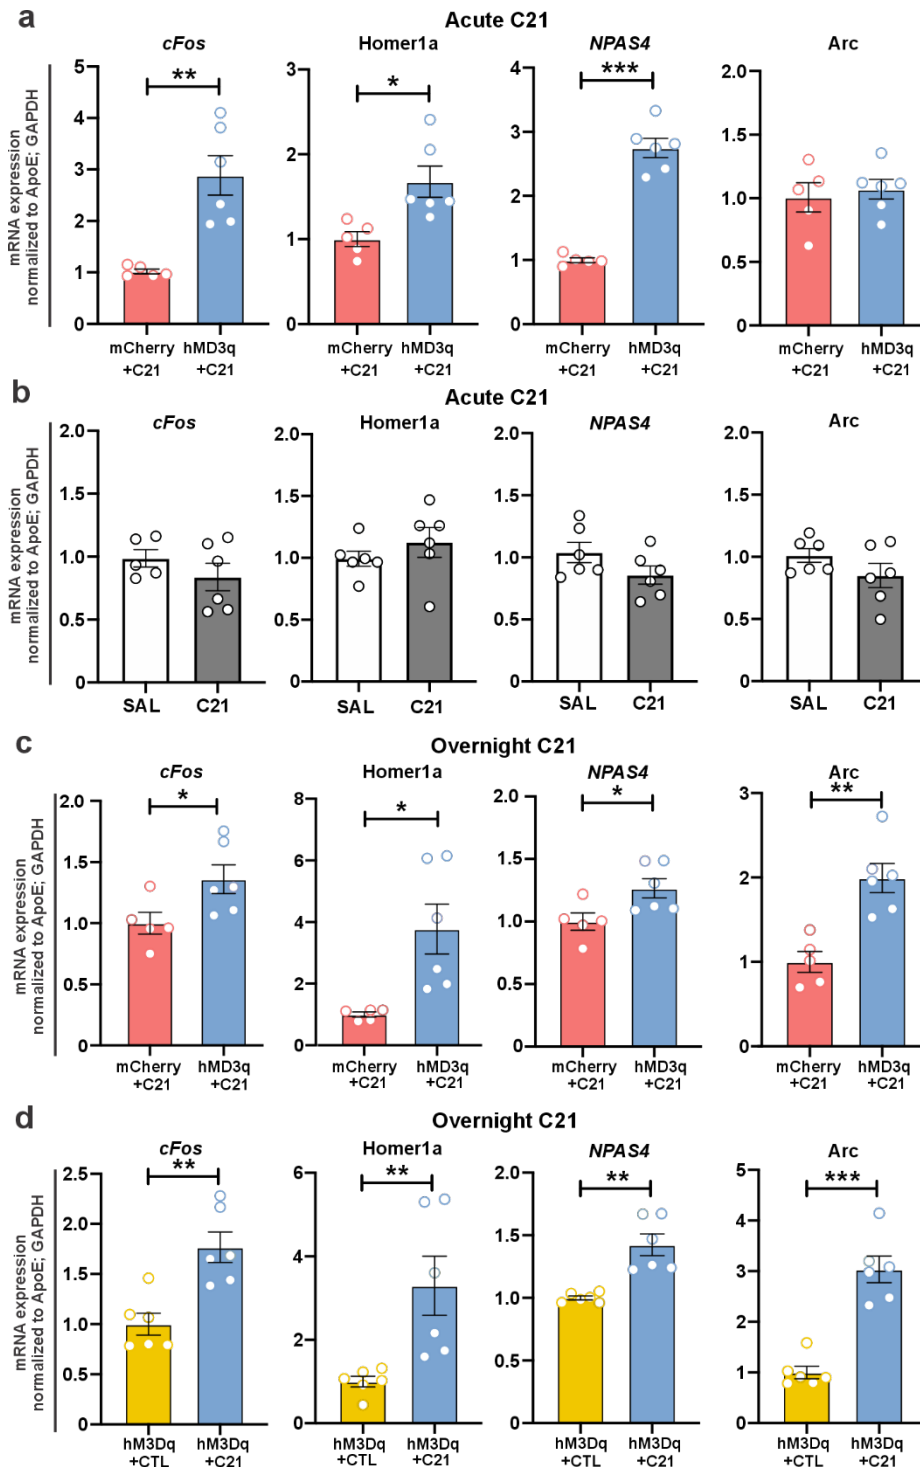

**Supplementary Fig. 1 | a** mRNA expression of immediate early genes (normalized to ApoE and GAPDH) in the mPFC of mCherry (n=5) and hM3Dq (n=6) mice 2h after acute C21 treatment (cFos:  $P=0.0044$ , Welch's t-test, Homer1a:  $P=0.0127$ , NPAS4:  $P<0.0001$ , Arc:  $P=0.6465$ ). **b** mRNA expression of immediate early genes in the mPFC of mCherry (n=6) and hM3Dq (n=6) mice 2h after acute saline or C21 i.p. treatment in wild-type mice (cFos:  $P=0.3028$ , Homer1a:  $P=0.3514$ , NPAS4:  $P=0.1322$ , Arc:  $P=0.1835$ ). **c** mRNA expression in the mPFC of mCherry (n=5) and hM3Dq (n=6) mice following overnight C21 treatment (cFos:  $P=0.0426$ , Homer1a:  $P=0.0185$ , Welch's t-test, NPAS4:  $P=0.0320$ , Arc:  $P=0.0015$ ). **d** mRNA

expression of immediate early genes in the mPFC of hM3Dq mice (n=6 per group) after overnight C21-treated and untreated controls (cFos:  $P=0.0021$ , Homer1a:  $P=0.0096$ , Welch's t-test, NPAS4:  $P=0.0040$ , Welch's t-test, Arc:  $p<0.0001$ ). Unless otherwise stated, statistical comparisons were performed using unpaired two-tailed Student's t-test. Data are presented as mean  $\pm$ SEM and the individual data points are depicted.  $P<0.05$ ,  $*P<0.01$ ,  $**P<0.001$ . Source data are provided as a Source Data file.

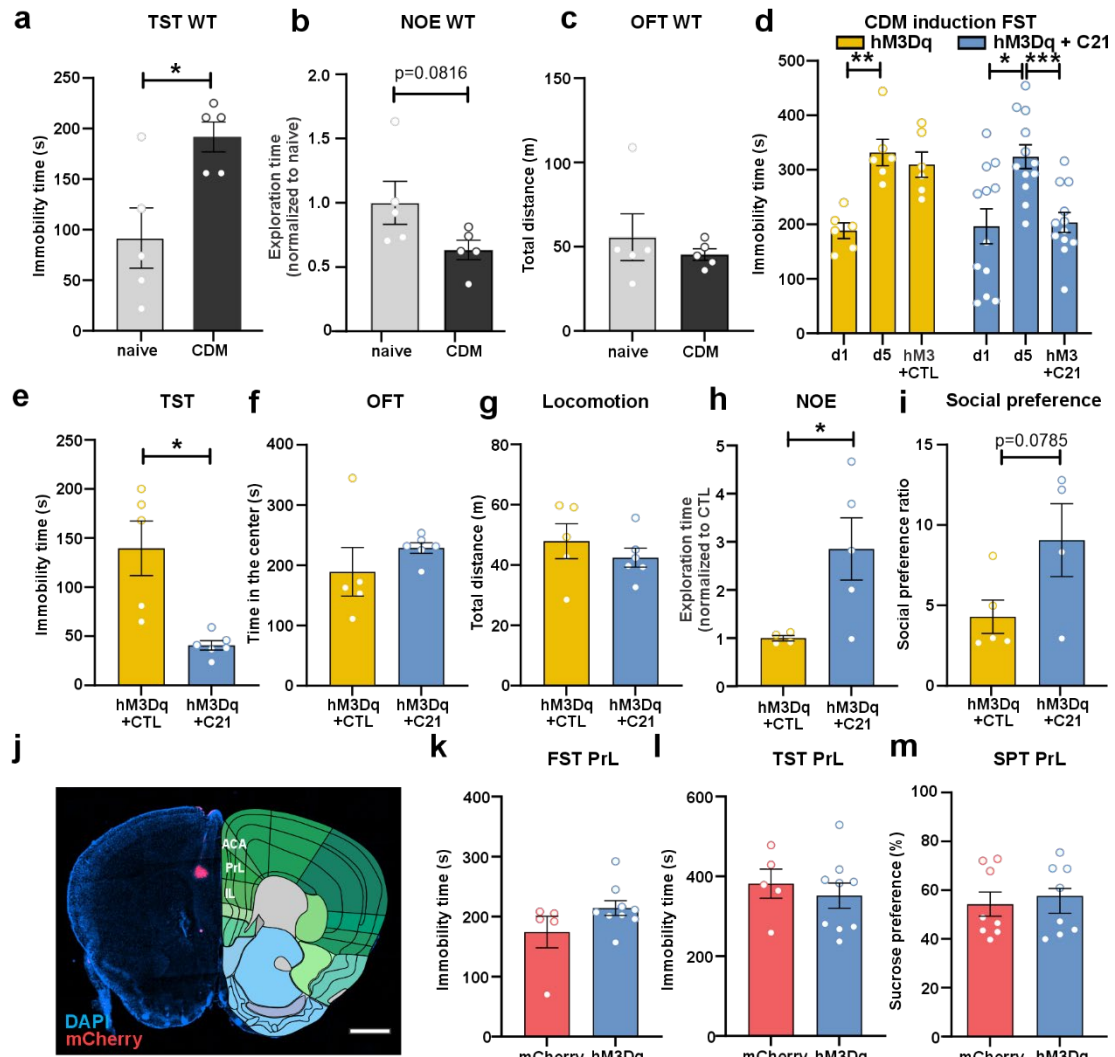

**Supplementary Fig. 2** | **a** Immobility time in tail suspension test (TST) of wild type (WT) CDM mice and naïve mice ( $n=5$ ,  $P=0.0171$ , unpaired Student's t-test). **b** Total time spent exploring two novel objects in novel object exploration test (NOE) between CDM and naïve WT mice. Data normalized to naïve group ( $n=5$ ,  $P=0.0816$ , unpaired Student's t-test). **c** Locomotion measured by distance travelled in open field test (OFT) of CDM and naïve WT mice ( $n=5$ ,  $P=0.5057$ , Welch's t-test). **d** Immobility time in CDM of hM3Dq-injected mice receiving either overnight C21 in drinking water or untreated controls (repeated measures two-way ANOVA with Bonferroni post-hoc test). **e** Immobility time in TST of hM3Dq-injected mice treated overnight with C21 ( $n=6$ ) and controls ( $n=5$ ) ( $P=0.0225$ , Welch's t-test). **f** Time spent in center of OFT of hM3Dq-injected mice treated with C21 ( $n=6$ ) and untreated controls ( $n=5$ ) ( $P=0.3862$ , Welch's t-test). **g** Locomotion measured by distance travelled in OFT between hM3Dq-injected mice treated overnight with C21 ( $n=6$ ) and untreated controls ( $n=5$ ) ( $P=0.4074$ , unpaired Student's t-test). **h** Total time spent exploring two novel objects of hM3Dq-injected mice overnight treated with C21 ( $n=5$ ) and untreated controls ( $n=4$ ) ( $P=0.0454$ , Welch's t-test). **i** Social interaction measured in three-chamber task between hM3Dq-injected

mice overnight treated with C21 (n=5) and untreated controls (n=4) ( $P=0.0785$ , unpaired Student's t-test). **j** Representative image of AAV-CaMKIIa-hM3D(Gq)-mCherry injection in lateral prefrontal cortex (PrL). Scale bar: 1000  $\mu\text{m}$ . **k** Immobility time in FST of PrL-injected mice with mCherry (n=5) or hM3Dq (n=9) treated overnight with C21 ( $P=0.5641$ , unpaired Student's t-test). **l** Immobility time in TST of PrL-injected mice with mCherry (n=5) or hM3Dq (n=9) treated overnight with C21 ( $P=0.1563$ , Mann-Whitney test). **m** Sucrose preference of C21-treated hM3Dq and mCherry mice (n=8,  $P=0.8785$ , Mann-Whitney test). Data are presented as mean  $\pm$ SEM and the individual data points are depicted.  $P<0.05$ ,  $*P<0.01$ ,  $**P<0.001$ . Source data are provided as a Source Data file.

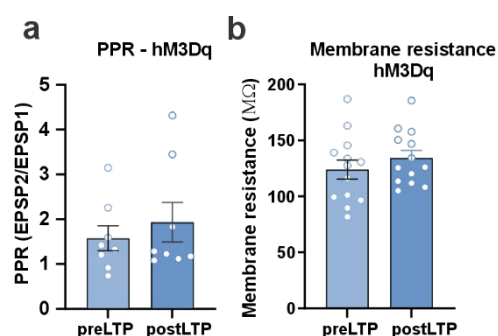

**Supplementary Fig. 3 | a** Analysis of PPR pre- vs. post aLTP induction in hM3Dq mice treated with C21 overnight (n=8,  $P=0.6406$ , Wilcoxon matched-pairs signed test). **b** The input resistance ( $R_m$ ) after aLTP in hM3Dq mice treated with C21 overnight (n=13,  $P=0.0743$ , paired Student's t-test). Data are presented as mean  $\pm$ SEM and the individual data points are depicted.  $*P<0.05$ ,  $**P<0.01$ ,  $***P<0.001$ . Source data are provided as a Source Data file.

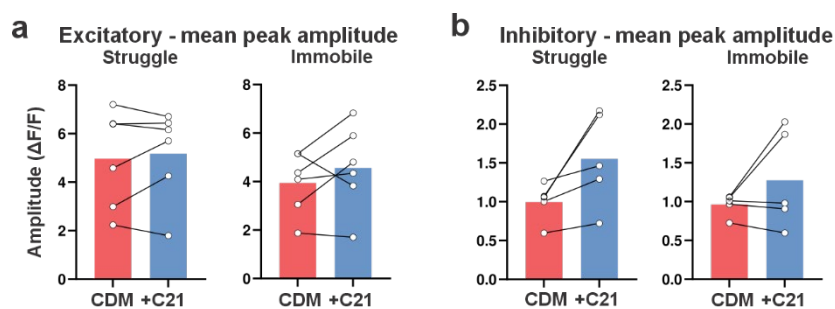

**Supplementary Fig. 4 | a** Mean peak amplitude of hippocampal excitatory neurons during struggle (left, n=6,  $P=0.5480$ ) and immobile (right, n=6,  $P=0.2766$ ) between post-CDM (red) and post-C21 (blue) conditions. **b** Mean peak amplitude of hippocampal inhibitory neurons during struggle (left, n=5,  $P=0.0631$ ) and immobile (right, n=5,  $P=0.2600$ ) periods between post-CDM (red) and post-C21 (blue) conditions. Statistical comparisons were performed using paired Student's t-test. Data are presented as mean  $\pm$ SEM and the individual data points are depicted.  $*P<0.05$ ,  $**P<0.01$ ,  $***P<0.001$ . Source data are provided as a Source Data file.

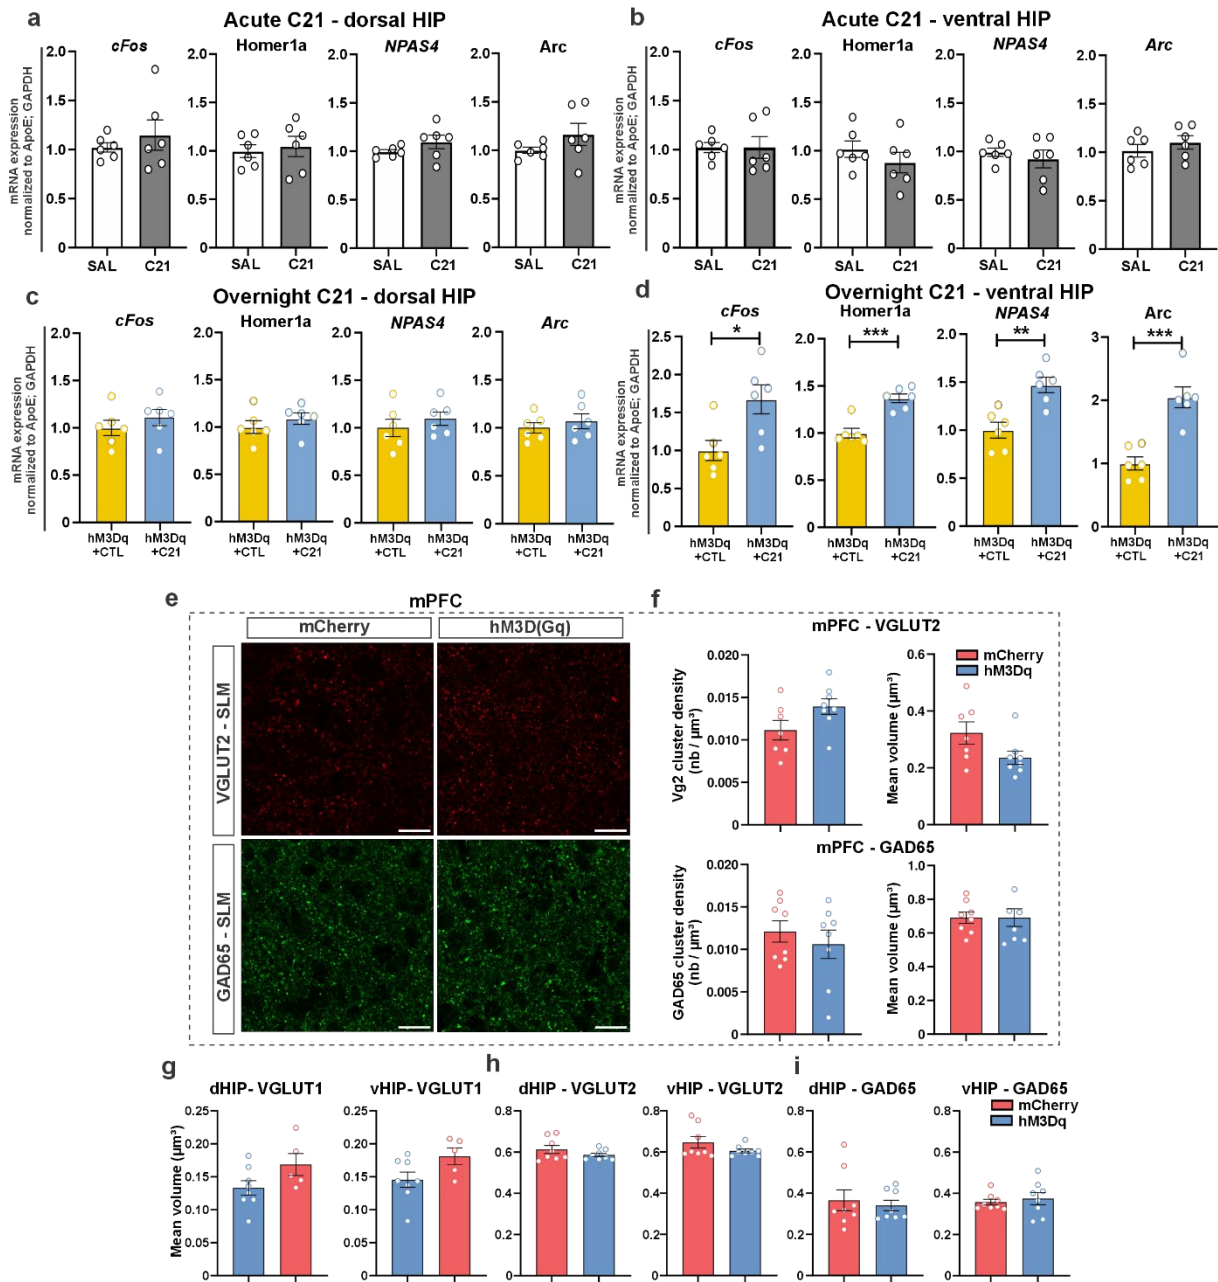

106

107

108 **Supplementary Fig. 5 | a-b** mRNA expression of immediate early genes (normalized to ApoE  
109 and GAPDH) in the dorsal hippocampus (**a**) (n=6 per group; *cFos*:  $P=0.4661$ , Welch's t-test,  
110 *Homer1a*:  $P=0.7027$ , *NPAS4*:  $P=0.2164$ , Welch's t-test, *Arc*:  $P=0.2179$ , Welch's t-test) and  
111 ventral hippocampus (**b**) (n=6 per group; *cFos*:  $P=0.9989$ , *Homer1a*:  $P=0.3380$ , *NPAS4*:  
112  $P=0.5117$ , *Arc*:  $P=0.3805$ ) of wild type mice 2h after acute C21 or saline i.p. treatment. **c-d**  
113 mRNA expression of immediate early genes in dorsal hippocampus (**c**) (n=6 per group, *cFos*:  
114  $P=0.1565$ , *Homer1a*:  $P=0.3442$ , *NPAS4*:  $P=0.4262$ , *Arc*:  $P=0.4874$ ) and ventral hippocampus  
115 (**d**) (n=6 per group, *cFos*:  $P=0.0160$ , *Homer1a*:  $P=0.0003$ , *NPAS4*:  $P=0.0022$ , *Arc*:  $P=0.0003$ )  
116 of hM3Dq-injected mice overnight treated with C21. **e** Representative confocal images

showing VGLUT2 and GAD65 immunostaining in IL layer V/VI of mCherry and hM3Dq mice after overnight C21 treatment. Scale bar: 20 $\mu$ m. **f** Left: quantification of VGLUT2 and GAD65 cluster density comparisons between hM3Dq mice treated with C21 and control (VGLUT2: mCherry n=7, hM3Dq n=8,  $P=0.0766$ ; GAD65: n=8,  $P=0.4825$ ). Right: quantification of VGLUT2 and GAD65 cluster mean volume comparisons (VGLUT2: mCherry n=7, hM3Dq n=8,  $P=0.0712$ ; GAD65: n=8,  $P=0.4987$ ). **g** VGLUT1 presynaptic clusters mean volume comparisons between hM3Dq mice treated with C21 and controls in the dorsal (mCherry n=5, hM3Dq n=8,  $P=0.0903$ ) and ventral (mCherry n=5, hM3Dq n=8,  $P=0.0711$ ) hippocampus. **h** VGLUT2 presynaptic clusters mean volume comparisons in the dorsal (n=8,  $P=0.2312$ , Welch's t test) and ventral (n=8,  $P=0.3953$ , Mann-Whitney test) hippocampus. **i** GAD65 presynaptic clusters mean volume comparisons in the dorsal (n=8,  $P=0.8785$ , Mann-Whitney test) and ventral (n=8,  $P=0.6454$ , Mann-Whitney test) hippocampus. Unless otherwise stated, statistical comparisons were performed using unpaired two-tailed Student's t-test. Data are presented as mean  $\pm$ SEM and the individual data points are depicted.  $P<0.05$ , \* $P<0.01$ , \*\* $P<0.001$ . Source data are provided as a Source Data file.

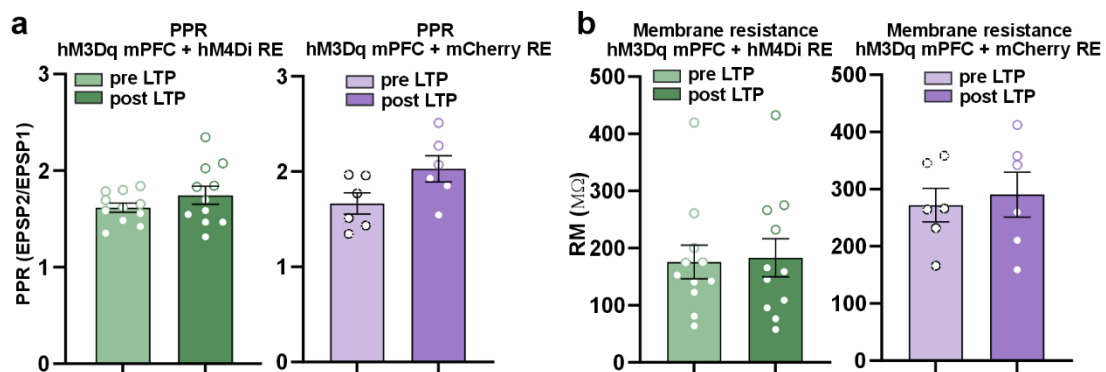

**Supplementary Fig. 6 | a** PPR comparison pre- vs. post aLTP induction. Left: hM3Dq mPFC + hM4Di RE mice treated with C21 overnight (n=10,  $P=0.2736$ , paired Student's t-test). Right: hM3Dq mPFC + mCherry RE mice treated with C21 overnight (n=6,  $P=0.1760$ , paired Student's t-test). **b** Input resistance ( $R_m$ ) comparison before and after aLTP. Left: hM3Dq mPFC + hM4Di RE mice treated with C21 overnight (n=11,  $P=0.8355$ , paired Student's t-test). Right: hM3Dq mPFC + mCherry RE mice treated with C21 overnight (n=6,  $P=0.5786$ , paired Student's t-test). Data are presented as mean  $\pm$ SEM and the individual data points are depicted. Source data are provided as a Source Data file.

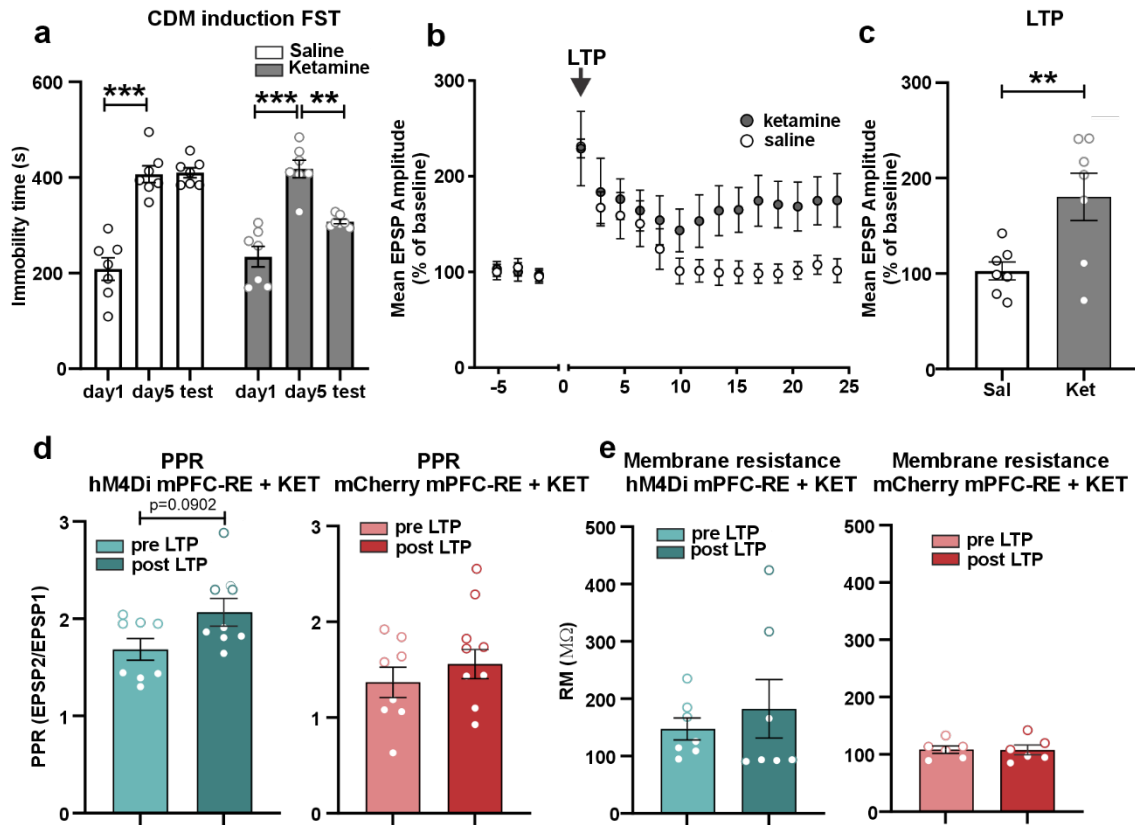

**Supplementary Fig. 7 |** **a** Immobility time of CDM mice treated with saline or ketamine i.p. (10mg/kg) ( $n=7$  per group, repeated measure two-way ANOVA). **b-c** LTP measurements in CDM mice with different treatments. **b** Time course of aLTP inducibility of ketamine (10mg/kg) and saline i.p. treated groups. **c** Group analysis ( $n=7$ ,  $P=0.02$ , unpaired Welch's t-test). **d-e** Electrophysiological recordings. **d** Paired-pulse ratio (PPR) comparison before and after LTP induction in Ketamine + hM4Di mPFC-RE (left,  $n=8$ ,  $P=0.2831$ ) and Ketamine + mCherry mPFC-RE (right,  $n=8$ ,  $P=0.0902$ , paired Student's t-test) groups. **e** Input resistance comparison before and after LTP induction in Ketamine + hM4Di mPFC-RE (left,  $n=6$ ,  $P=0.8708$ ) and Ketamine + mCherry mPFC-RE (right,  $n=7$ ,  $P=0.3600$ ), paired Student's t-test. Data are presented as mean  $\pm$  SEM and the individual data points are depicted.  $P<0.05$ ,  $*P<0.01$ ,  $**P<0.001$ . Source data are provided as a Source Data file.
