# Supplementary material for: Linking Brain Circuitry and Neural Plasticity in Antidepressant Response: The mPFC-Reuniens-Hippocampus Pathway.
Source: Research Square preprint supplement (doi:10.21203/rs.3.rs-6348176/v1), 2025-04-03
Supplement: Supplementary file 2 [file 2bf8f13b7efd34b446e52850.xlsx]

## Sheet: Supplementary Fig. 3a
Paired pulse ratio - hM3Dq + C21
	hM3Dq + C21
	Paired pulse ratio (EPSP2/EPSP1)
	Baseline	Post-induction
	1.798	1.313
	1.653	1.546
	1.693	2.024
	1.557	1.695
	1.787	1.83
	1.62	1.844
	1.584	1.467
	1.842	2.076
	1.483	2.346
	1.42	1.586
Group	Mean	± SEM	n	Statistics	F test (variance)	t value	P value	Replication
Baseline	1558	0.2764	8	Wilcoxon paired test	-	-	P=0.6406	Two cohorts of males and females mixed
Post Induktion	1916	0.4397	8

## Sheet: Supplementary Fig. 3b
Membrane resistance - hM3Dq + C21
	hM3Dq + C21
	Membrane resistance (MOhm)
	Baseline	Post-induction
	96.52	111.7
	99.44	126
	89.54	108.2
	130.8	125.5
	186.9	160.6
	139	150.4
	145.6	157.7
	116.1	113.6
	163	185.6
	81.69	134.2
	101.1	105.1
	127.5	120.3
	133.7	146.9
Group	Mean	± SEM	n	Statistics	F test (variance)	t value	P value	Replication
Baseline	123.9	8490	13	Two-tailed Paired t test	-	t=1.955	P=0.0743	Two cohorts of males and females mixed
Post Induktion	134.3	6748	13
