# Supplementary material for: Linking Brain Circuitry and Neural Plasticity in Antidepressant Response: The mPFC-Reuniens-Hippocampus Pathway.
Source: Research Square preprint supplement (doi:10.21203/rs.3.rs-6348176/v1), 2025-04-03
Supplement: Supplementary file 3 [file 5d8efc518759ebfa5e63c01c.xlsx]

## Sheet: Supplementary Fig. 6a
Paired pulse ratio - hM3Dq mPFC + hM4Di RE
	hM3Dq mPFC + hM4Di RE
	Paired pulse ratio (EPSP2/EPSP1)
	Baseline	Post-induction
	1.798	1.313
	1.653	1.546
	1.693	2.024
	1.557	1.695
	1.787	1.83
	1.62	1.844
	1.584	1.467
	1.842	2.076
	1.483	2.346
	1.42	1.586
Group	Mean	± SEM	n	Statistics	F test (variance)	t value	P value	Replication
BL	1.617	0.04777	10	Two-tailed paired Student's t test	-	t=1.166	P=0.2736	Two cohorts of males and females mixed
Min 20-30	1.745	0.09414	10
Paired pulse ratio - hM3Dq mPFC + mCherry RE
	hM3Dq mPFC + hM4Di RE
	Paired pulse ratio (EPSP2/EPSP1)
	Baseline	Post-induction
	1.512	2.511
	1.958	1.928
	1.966	1.544
	1.345	2.072
	1.433	2.27
	1.772	1.852
Group	Mean	± SEM	n	Statistics	F test (variance)	t value	P value	Replication
BL	1.664	0.1107	6	Two-tailed paired Student's t test	-	t=1.575	P=0.1760	Two cohorts of males and females mixed
Min 20-30	2.03	0.1377	6

## Sheet: Supplementary Fig.6b
Membrane resistance - hM3Dq mPFC + hM4Di RE
	hM3Dq mPFC + hM4Di RE
	Membrane resistance (MOhm)
	Baseline	Post-induction
	152.5	57.73
	419.9	266.6
	80.87	76.66
	142.3	232.1
	140.6	432.6
	175.1	159
	174.4	108.8
	64.01	95.63
	261	275
Group	Mean	± SEM	n	Statistics	F test (variance)	t value	P value	Replication
BL	175.8	29.34	11	Two-tailed paired Student's t test	-	t=0.2132	P=0.8355	Two cohorts of males and females mixed
Min 20-30	183.2	33.39	11
Membrane resistance - hM3Dq mPFC + mCherry RE
	hM3Dq mPFC + hM4Di RE
	Membrane resistance (MOhm)
	Baseline	Post-induction
	265.9	342.4
	345.6	259.8
	264.4	358.2
	231.7	158.9
	166.1	210.8
	358.7	412.4
Group	Mean	± SEM	n	Statistics	F test (variance)	t value	P value	Replication
BL	272.1	29.36	6	Two-tailed paired Student's t test	-	t=0.5786	P=0.5879	Two cohorts of males and females mixed
Min 20-30	290.4	39.48	6
