# Supplementary material for: Linking Brain Circuitry and Neural Plasticity in Antidepressant Response: The mPFC-Reuniens-Hippocampus Pathway.
Source: Research Square preprint supplement (doi:10.21203/rs.3.rs-6348176/v1), 2025-04-03
Supplement: Supplementary file 4 [file 6939aeed8747df7c34a36b74.xlsx]

## Sheet: Fig. 4b
mRNA expression - dHIP - Acute
cFos
mRNA expression (normalized to ApoE; GAPDH)
mCherry +C21	hM3Dq +C21
0.758	0.82
1.443	0.75
0.798	1.01
1.04	1.87
0.928	1.092
	0.995
Group	Mean	± SEM	n	Statistics	F test (variance)	t value	P value	Replication
mCherry	0.9934	0.1229	5	Two-tailed Student's t test	F(5,4) = 2.151, p = 0.4781	t=0.4510	P=0.6627	Two cohorts of males and females mixed
hM3Dq	1090	0.1646	6
mRNA expression - dHIP - Acute
Homer1a
mRNA expression (normalized to ApoE; GAPDH)
mCherry +C21	hM3Dq +C21
1.233	0.73
0.704	1.08
1.063	0.82
1.165	1.33
0.933	0.801
	1.178
Group	Mean	± SEM	n	Statistics	F test (variance)	t value	P value	Replication
mCherry	1020	0.09372	5	Two-tailed Student's t test	F(5,4) = 1.326, p = 0.8073	t=0.2158	P=0.8339	Two cohorts of males and females mixed
hM3Dq	0.9898	0.09853	6
mRNA expression - dHIP - Acute
NPAS4
mRNA expression (normalized to ApoE; GAPDH)
mCherry +C21	hM3Dq +C21
1.161	0.83
0.839	1.29
1.144	1.26
0.963	0.9
1.144	1.442
	1.027
Group	Mean	± SEM	n	Statistics	F test (variance)	t value	P value	Replication
mCherry	1050	0.06406	5	Two-tailed Student's t test	F(5,4) = 2.858, p = 0.3309	t=0.6036	P=0.5610	Two cohorts of males and females mixed
hM3Dq	1125	0.09886	6
mRNA expression - dHIP - Acute
Arc
mRNA expression (normalized to ApoE; GAPDH)
mCherry +C21	hM3Dq +C21
1.108	0.71
1.127	0.65
0.765	1.08
1.298	0.8
1.017	1.441
	1.059
Group	Mean	± SEM	n	Statistics	F test (variance)	t value	P value	Replication
mCherry	1063	0.08725	5	Two-tailed Student's t test	F(5,4) = 2.310, p = 0.4375	t=0.6847	P=0.5108	Two cohorts of males and females mixed
hM3Dq	0.9567	0.1211	6

## Sheet: Fig. 4c
mRNA expression - dHIP - Overnight
cFos
mRNA expression (normalized to ApoE; GAPDH)
mCherry +C21	hM3Dq +C21
0.973052	0.755456
0.802597	1.18906
1.17467	1.1843
1.17338	1.39484
0.876299	1.15677
	1.08237
Group	Mean	± SEM	n	Statistics	F test (variance)	t value	P value	Replication
mCherry	1000	0.07602	5	Two-tailed Student's t test	F(5,4) = 1.522, P=0.7053	t=1.088	P=0.3050	Two cohorts of males and females mixed
hM3Dq	1127	0.08560	6
		,
mRNA expression - dHIP - Overnight
Homer1a
mRNA expression (normalized to ApoE; GAPDH)
mCherry +C21	hM3Dq +C21
0.830247	1.05043
0.977661	1.09175
0.806902	1.08142
1.15468	0.996536
1.23051	0.777668
	1.18708
Group	Mean	± SEM	n	Statistics	F test (variance)	t value	P value	Replication
mCherry	1000	0.08475	5	Two-tailed Student's t test	F(4,5) = 1.864, P=0.5097	t=0.3116	P=0.7624	Two cohorts of males and females mixed
hM3Dq	1031	0.05667	6
mRNA expression - dHIP - Overnight
NPAS4
mRNA expression (normalized to ApoE; GAPDH)
mCherry +C21	hM3Dq +C21
1.10791	0.745461
0.973899	0.777694
0.823343	0.954946
0.984584	0.832624
1.11026	1.12785
	0.971709
Group	Mean	± SEM	n	Statistics	F test (variance)	t value	P value	Replication
mCherry	1000	0.05288	5	Two-tailed Student's t test	F(6,4) = 1.480, P=0.7257	t=1.220	P=0.2536	Two cohorts of males and females mixed
hM3Dq	0.9017	0.05872	6
mRNA expression - dHIP - Overnight
Arc
mRNA expression (normalized to ApoE; GAPDH)
mCherry +C21	hM3Dq +C21
0.93237	0.99205
0.712087	0.743916
0.930019	0.694805
1.20019	0.802436
1.22534	1.09391
	0.854729
Group	Mean	± SEM	n	Statistics	F test (variance)	t value	P value	Replication
mCherry	1000	0.09571	5	Two-tailed Student's t test	F(7,4) = 1.011, P=0.4746	t=1.235	P=0.2482	Two cohorts of males and females mixed
hM3Dq	0.8636	0.06223	6

## Sheet: Fig. 4d
mRNA expression - vHIP - Acute
cFos
mRNA expression (normalized to ApoE; GAPDH)
mCherry +C21	hM3Dq +C21
0.785	1.72
1.333	2.63
0.882	1.86
1.084	2.47
1.05	1.268
	1.15
Group	Mean	± SEM	n	Statistics	F test (variance)	t value	P value	Replication
mCherry	1027	0.09408	5	Two-tailed Student's t test	F(5,4) = 8.310, p = 0.0617	t=2.872	0.0184	Two cohorts of males and females mixed
hM3Dq	1850	0.2476	6
mRNA expression - vHIP - Acute
Homer1a
mRNA expression (normalized to ApoE; GAPDH)
mCherry +C21	hM3Dq +C21
1.003	2.09
1.283	2.28
0.714	1.74
0.907	2.3
1.01	2.004
	2.234
Group	Mean	± SEM	n	Statistics	F test (variance)	t value	P value	Replication
mCherry	0.9834	0.09200	5	Two-tailed Student's t test	F(5,4) = 1.082, p = 0.9662	t=8.830	<0.0001	Two cohorts of males and females mixed
hM3Dq	2108	0.08735	6
mRNA expression - vHIP - Acute
NPAS4
mRNA expression (normalized to ApoE; GAPDH)
mCherry +C21	hM3Dq +C21
0.707	2.36
1.145	2.09
1.148	1.94
1.017	1.97
1.03	2.494
	1.918
Group	Mean	± SEM	n	Statistics	F test (variance)	t value	P value	Replication
mCherry	1009	0.08048	5	Two-tailed Student's t test	F(5,4) = 1.814, p = 0.5839	t=8.525	<0.0001	Two cohorts of males and females mixed
hM3Dq	2129	0.09893	6
mRNA expression - vHIP - Acute
Arc
mRNA expression (normalized to ApoE; GAPDH)
mCherry +C21	hM3Dq +C21
0.97	1.08
1.161	1.24
0.87	1.98
0.971	2.3
0.909	1.342
	1.535
Group	Mean	± SEM	n	Statistics	F test (variance)	t value	P value	Replication
mCherry	0.9762	0.05001	5	Two-tailed Welch's t test	F(5,4) = 17.64, P=0.0158	t=3.045, df=5.671	P=0.0243	Two cohorts of males and females mixed
hM3Dq	1580	0.1917	6

## Sheet: Fig. 4e
mRNA expression - vHIP - Overnight
cFos
mRNA expression (normalized to ApoE; GAPDH)
mCherry +C21	hM3Dq +C21
1.33986	1.35089
1.00032	1.06305
1.47657	0.601976
0.643475	1.11752
0.539783	0.72394
	1.00964
Group	Mean	± SEM	n	Statistics	F test (variance)	t value	P value	Replication
mCherry	1000	0.1846	5	Two-tailed Student's t test	F(4,5) = 2.286, P=0.3888	t=0.1069	P=0.9172	Two cohorts of males and females mixed
hM3Dq	0.9778	0.1115	6
		,
mRNA expression - vHIP - Overnight
Homer1a
mRNA expression (normalized to ApoE; GAPDH)
mCherry +C21	hM3Dq +C21
0.25175	1.71279
1.10832	1.70514
1.07386	1.80338
1.28852	1.55103
1.27754	1.48984
	1.84263
Group	Mean	± SEM	n	Statistics	F test (variance)	t value	P value	Replication
mCherry	1000	0.1920	5	Mann-Whitney test	-	-	P=0.0043	Two cohorts of males and females mixed
hM3Dq	1684	0.05659	6
mRNA expression - vHIP - Overnight
NPAS4
mRNA expression (normalized to ApoE; GAPDH)
mCherry +C21	hM3Dq +C21
1.05828	1.74477
1.18465	2.01526
0.942057	1.69444
0.76205	1.8064
1.05296	1.3641
	1.51871
Group	Mean	± SEM	n	Statistics	F test (variance)	t value	P value	Replication
mCherry	1000	0.07081	5	Two-tailed Student's t test	F(5,4) = 2.058, P=0.5043	t=5.717	P=0.0003	Two cohorts of males and females mixed
hM3Dq	1691	0.09272	6
mRNA expression - vHIP - Overnight
Arc
mRNA expression (normalized to ApoE; GAPDH)
mCherry +C21	hM3Dq +C21
0.746411	1.57665
1.24468	2.10028
1.06882	1.56168
1.07869	1.53222
0.861402	1.48376
	1.1401
Group	Mean	± SEM	n	Statistics	F test (variance)	t value	P value	Replication
mCherry	1000	0.08784	5	Two-tailed Student's t test	F(5,4) = 2.462, P=0.4034	t=3.534	P=0.0064	Two cohorts of males and females mixed
hM3Dq	1566	0.1258	6

## Sheet: Fig. 4f
Synaptic quantification - Dorsal Hippocampus - VGLUT1
	Dorsal hippocampus
	VGLUT1 puncta density (number /µm³)
	mCherry + C21	hM3Dq + C21
	0.0822437	0.0910781
	0.106311	0.132963
	0.0882826	0.112132
	0.069206	0.113787
	0.0906876	0.0996522
		0.04181
		0.102665
		0.107836
Group	Mean	± SEM	n	Statistics	F test (variance)	t value	P value	Replication
mCherry + C21	0.08735	0.006028	5	Two-tailed Student's t test	F(4,7) = 1.594, P=0.5533	t=1.608	P=0.1362	One cohort of males and females mixed
hM3Dq + C21	0.1002	0.009409	8
Synaptic quantification - Dorsal Hippocampus -VGLUT2
	Dorsal hippocampus
	VGLUT2 puncta density (number /µm³)
	mCherry + C21	hM3Dq + C21
	0.114272	0.0732074
	0.0662947	0.0928351
	0.0551645	0.0977389
	0.0732823	0.0766513
	0.0443836	0.0833519
	0.0465798	0.105163
	0.0809811	0.072359
	0.0817922	0.102144
Group	Mean	± SEM	n	Statistics	F test (variance)	t value	P value	Replication
mCherry + C21	0.07034	0.008093	8	Two-tailed Student's t test	F(7,7) = 2.990, P=0.1717	t=1.881	P=0.0809	One cohort of males and females mixed
hM3Dq + C21	0.08793	0.004680	8
Synaptic quantification - Dorsal Hippocampus -GAD65
	Dorsal hippocampus
	GAD65 puncta density (number /µm³)
	mCherry + C21	hM3Dq + C21
	0.0161964	0.018856
	0.0143117	0.0195876
	0.0203811	0.0145256
	0.0164692	0.0224332
	0.0215591	0.0104153
	0.0184841	0.0129881
	0.0191877	0.0194636
	0.0182609	0.0229571
Group	Mean	± SEM	n	Statistics	F test (variance)	t value	P value	Replication
mCherry + C21	0.01811	0.0008362	8	Two-tailed Student's t test	F(7,7) = 3.661, P=0.1084	t=0.2509	P=0.8055	One cohort of males and females mixed
hM3Dq + C21	0.01765	0.001600	8

## Sheet: Fig. 4g
Synaptic quantification - Ventral Hippocampus - VGLUT1
	Ventral hippocampus
	VGLUT1 puncta density (number /µm³)
	mCherry + C21	hM3Dq + C21
	0.0753436	0.0795097
	0.0938121	0.111574
	0.0878859	0.0837502
	0.0367326	0.110718
	0.104785	0.0849219
		0.0190451
		0.0799189
		0.0976063
Group	Mean	± SEM	n	Statistics	F test (variance)	t value	P value	Replication
mCherry + C21	0.07971	0.01175	5	Two-tailed Student's t test	F(7,4) = 1.224, P=0.8940	t=1.024	P=0.3278	One cohort of males and females mixed
hM3Dq + C21	0.08338	0.01028	8
Synaptic quantification - Ventral Hippocampus -VGLUT2
	Ventral hippocampus
	VGLUT2 puncta density (number /µm³)
	mCherry + C21	hM3Dq + C21
	0.0675675	0.0719222
	0.0713607	0.0767511
	0.0504978	0.0876443
	0.041651	0.092024
	0.0404157	0.086122
	0.0279753	0.0868457
	0.0738313	0.059669
	0.0814553	0.0861345
Group	Mean	± SEM	n	Statistics	F test (variance)	t value	P value	Replication
mCherry + C21	0.05684	0.006807	8	Two-tailed Student's t test	F(7,7) = 3.212, P=0.1466	t=3.085	P=0.0081	One cohort of males and females mixed
hM3Dq + C21	0.08089	0.003798	8
Synaptic quantification - Ventral Hippocampus -GAD65
	Ventral hippocampus
	GAD65 puncta density (number /µm³)
	mCherry + C21	hM3Dq + C21
	0.0187228	0.015812
	0.0155858	0.0142405
	0.0192404	0.0184903
	0.0150123	0.0212057
	0.0172566	0.0150774
	0.0186174	0.0138437
	0.0185244	0.0176285
	0.0166924	0.0197023
Group	Mean	± SEM	n	Statistics	F test (variance)	t value	P value	Replication
mCherry + C21	0.01746	0.0005570	8	Two-tailed Student's t test	F(7,7) = 2.895, P=0.1841	t=0.4152	P=0.6843	One cohort of males and females mixed
hM3Dq + C21	0.01700	0.0009477	8
