# Supplementary material for: Linking Brain Circuitry and Neural Plasticity in Antidepressant Response: The mPFC-Reuniens-Hippocampus Pathway.
Source: Research Square preprint supplement (doi:10.21203/rs.3.rs-6348176/v1), 2025-04-03
Supplement: Supplementary file 5 [file 8297d6128aad147931c2a33e.xlsx]

## Sheet: Fig. 6e
CDM induction + FST test phase
	Immobility time in seconds
	Ketamine + PFC -> Re mCherry								Ketamine + Re hM4Di								Ketamine + PFC -> RE hM4Di
day1	185	53	210	69.3	185	148	192		31	265	115.7	199	211	64	212	141	140	217	109	56	228	99	218
day5	398	192	414	185	271	422	376		313	482	376	353	344	397	344	264	351	269	355	276	390	250	249	222
+C21	249	156	333	102.7	245	324	206		361	420	366	399	346	289	234	303	379	344	224	486	410	270	262	281
Group		Mean	± SEM	n	Statistics	t or F value	P value	Multiple comparison	Replication
Ketamine + PFC -> Re mCherry	day1	148.9	23.7702	7	Repeated measures ANOVA + Bonferroni Post Hoc test	Time: F (1.836, 35.80) = 59.75 Virus: F (2, 20) = 1.335 Interaction: F (4, 39) = 3.159	Time: P<0.0001 Virus: P=0.2856 Interaction: P=0.0242	day1 vs day5: P=0,0009	Yes, two cohorts combined
	day5	322.571	39.4678	7				day1 vs +C21: p=0,0192
	152.429	230.814	31.7294	7				day5 vs +C21: P=0.0093
Ketamine + Re hM4Di	day1	154.838	28.6039	8				day1 vs day5: P=0,0005
	day5	359.125	22.555	8				day1 vs +C21: P=0.0017
	+C21	339.75	21.6463	8				day5 vs +C21: P=0,6987
Ketamine + PFC -> RE hM4Di	day1	152.429	25.9916	7				day1 vs day5: P=0084
	day5	295.25	21.6579	8				day1 vs +C21: p=0,0173
	+C21	332	31.3853	8				day5 vs +C21: P=0,5380

## Sheet: Fig. 6f
LTP induction Ketamine + PFC -> Re mCherry vs Ketamine + PFC -> Re hM4Di
Ketamine + PFC -> Re mCherry				Ketamine + PFC -> RE hM4Di
EPSPs amplitude normalized to baseline				EPSPs amplitude normalized to baseline
time [min]	Mean	SEM		time [min]	Mean	SEM
-5.13341	107.478	11.8964		-5.13341	97.0214	11.748
-3.37704	98.4475	9.47965		-3.37704	98.0078	10.7633
-1.6207	94.0744	9.03535		-1.6207	104.971	12.4882
1.1109	175	16.8205		1.1109	127.747	10.3305
2.8673	120.365	12.3373		2.8673	96.8774	10.1474
4.62365	117.504	12.5764		4.62365	94.2622	9.78653
6.38001	130.122	15.1974		6.38001	90.5918	10.6271
8.13637	120.637	13.9273		8.13637	94.4472	12.2536
9.89271	135.021	17.9809		9.89271	98.7929	12.3487
11.6491	136.192	14.3129		11.6491	94.5056	11.1127
13.4054	131.206	16.8285		13.4054	92.3917	12.149
15.1618	147.096	18.5399		15.1618	97.8672	13.1974
16.9182	154.313	19.0202		16.9182	96.9842	11.561
18.6745	158.158	17.9918		18.6745	96.6472	13.3103
20.4309	153.33	18.5487		20.4309	96.3349	13.3282
22.1872	161.889	16.5807		22.1872	97.7249	12.4176
23.9436	169.651	19.6108		23.9436	94.6176	10.6361
25.7	163.985	24.1784		25.7	95.8197	13.5227
27.4563	164.976	22.9089		27.4563	97.5576	13.5914
29.2127	172.175	24.5379		29.2127	92.7008	14.2295
30.969	162.367	20.8484		30.969	98.0561	14.4961

## Sheet: Fig. 6g
LTP comparison Ketamine + PFC -> Re mCherry vs Ketamine + PFC -> Re hM4Di
LTP group comparison
Ketamine + PFC -> Re mCherry	Ketamine + PFC -> Re hM4Di
143.165	179.728
116.382	92.2452
210.613	116.203
142.262	83.6257
224	67.2709
140.249	43.5016
297.354	67.2955
101.846	134.851
134.862	155.855
Group	Mean	± SEM	n	Statistics	F test (variance)	t value	P value	Replication
Ketamine + PFC -> Re mCherry	167.9	21.04	9	Two-tailed paired Student's t-test	F(8,8) = 1.940, P=0.3679	2.446	P=0.0264	Two cohorts of males and females mixed
Ketamine + PFC -> Re hM4Di	104.5	15.11	9
