# Supplementary material for: Linking Brain Circuitry and Neural Plasticity in Antidepressant Response: The mPFC-Reuniens-Hippocampus Pathway.
Source: Research Square preprint supplement (doi:10.21203/rs.3.rs-6348176/v1), 2025-04-03
Supplement: Supplementary file 6 [file 835323742ca3588da49a43d2.xlsx]

## Sheet: Supplementary Fig. 2a
TST CDM versus naive
Immobility time (s)
naive	CDM
74	225
192	156
50	156
22	211
121	211
Group	Mean	± SEM	n	Statistics	F test (variance)	t value	P value	Replication
naive	91.80	29.86	5	Two-tailed unpaired t test	F(4,4) = 4.049, P=0.2043	t=2.999	P=0.0171	No, one cohort (male and female)
CDM	191.8	14.84	5

## Sheet: Supplementary Fig. 2b
NOE - CDM versus naive
Time spent exploring both objects (seconds)
naive	CDM
37.7	18.9
47.6	32.1
84.1	41.9
51.9	38.2
36.3	31.9
Group	Mean	± SEM	n	Statistics	F test (variance)	t value	P value	Replication
naive	51.52	8.659	5	Two-tailed unpaired t test	F(4,4) = 4.896, P=0.1531	t=1.991	P=0.0816	No, one cohort (male and female)
CDM	32.60	3.913	5

## Sheet: Supplementary Fig. 2c
Locomotion - CDM versus naive
Values
Naive	CDM
108.9414	49.8427
48.3515	55.6488
44.9363	44.536
48.0699	40.8243
28.0928	36.0562
Group	Mean	± SEM	n	Statistics	F test (variance)	t value	P value	Replication
Naive	55.68	13.83	5	Two-tailed Welch's t test	F(4,4) = 16.36, P=0.0191	t=0.7228	P=0.5057	No, one cohort (male and female)
CDM	45.38	3.419	5

## Sheet: Supplementary Fig.2d
CDM induction + FST test phase
	hM3Dq + CTL						hM3Dq+C21
day1	239	188	207	142	196	157	166	59	266	114	306	261	122	55.	67	366	313	256
day5	444	321	318	339	273	297	292	235	269	201	291	414	408	454	305	333	368	312
test phase	369	305	386	246	289	263	202	154	167	179	172	224	278	316	205	80	188	278
	hM3Dq + CTL			hM3Dq+C21
	Mean	SEM	N	Mean	SEM	N
day1	188.45	14.32287285	6	196.380833	32.06366785	12
day5	332	24.23220997	6	324.0125	21.84724229	12
test phase	309.666667	23.11372848	6	203.583333	18.47375630	12
	Group	Mean	± SEM	n	Statistics	t or F value	P value	Multiple comparison	Replication
hM3Dq + CTL	day1	188.45	14.32287285	6	Repeated measures ANOVA + Bonferroni Post Hoc test	time: F (1.397, 22.35) = 13.55 Virus: F (1, 16) = 2.191 Interaction: F (2, 32) = 2.807	time: P=0.0005 Virus: P=0.1582 Interaction: P=0.0753	day5 vs day1: P=0.0034 day5 vs test: P>0.9999	Yes, two cohorts - both sexes combined
	day5	332	24.23220997	6
	test phase	309.666667	23.11372848	6
hM3Dq+C21	day1	196.380833	32.06366785	12				day5 vs day1: P=0.0244 day5 vs test: P=0.0002
	day5	324.0125	21.84724229	12
	test phase	203.583333	18.47375630	12

## Sheet: Supplementary Fig. 2e
TST
Immobility time (s)
hM3Dq+CTL	hM3Dq+C21
200	46
184	36.6
168	38
64.9	41
81	23.6
	59
Group	Mean	± SEM	n	Statistics	F test (variance)	t value	P value	Replication
hM3Dq+CTL	139.6	27.79	5	Two-tailed Welch's t test	F(4,5) = 28.40, p=0.0025	t=3.508	P=0.0225	Two cohorts of males and females mixed
hM3Dq+C21	40.70	4.759	6

## Sheet: Supplementary Fig. 2f
OFT - Time in center
Time in center
hM3Dq+CTL	hM3Dq+C21
343.6	252166
109967	223833
152.3	240033
171.3	230.6
161.6	188133
	230033
Group	Mean	± SEM	n	Statistics	F test (variance)	t value	P value	Replication
hM3Dq+CTL	187.8	40.34	5	Two-tailed Welch's t test	F(4,5) = 17.35, P=0.0078	t=0.9616	P=0.3862	No, one cohort (male and female)
hM3Dq+C21	227.5	8841	6

## Sheet: Supplementary Fig. 2g
Locomotion – Open field test
Distance travelled in OFT (m)
hM3Dq+CTL	hM3Dq+C21
59.7785	39.6903
42.725	55.6221
49.3217	39.3136
28.4786	42.2999
59.1999	32.62
	45.0875
Group	Mean	± SEM	n	Statistics	F test (variance)	t value	P value	Replication
hM3Dq+CTL	47.90	5.809	5	Two-tailed t test	F(4,5) = 2.863, P=0.2790	t=0.8691	P=0.4074	No, one cohort (male and female)
hM3Dq+C21	42.44	3.133	6

## Sheet: Supplementary Fig. 2h
Novel object exploration task
Time spent exploring both objects (Normalized to CTL)
hM3Dq+CTL	hM3Dq+C21
1.12453	2.83058
0.891503	2.01818
0.912881	0.98557
1.07108	3.81187
	4.6991
Group	Mean	± SEM	n	Statistics	F test (variance)	t value	P value	Replication
hM3Dq + CTL	1000	0.05768	4	Unpaired t test with Welch's correction	F(4,3) = 159.9, p=0.0016	t=2.854	P=0.0454	No, one cohort (male and female)
hM3Dq + C21	2869	0.6523	5

## Sheet: Supplementary Fig. 2i
Social preference in a 3 chamber task
Time in center
hM3Dq+CTL	hM3Dq+C21
8.08571429	12.7904509
2.66371681	2.94256999
2.78502674	8.32014388
2.97382199	12.1894737
4.98522167
Group	Mean	± SEM	n	Statistics	F test (variance)	t value	P value	Replication
hM3Dq+CTL	4.299	1.038	5	Unpaired t test	F(3,4) = 3.819, p=0.2283	t=2.059	P=0.0785	No, one cohort (male and female)
hM3Dq+C21	9.061	2.267	4

## Sheet: Supplementary Fig. 2k
FST - Prelimbic
Immobility time (s)
mCherry + C21	hM3Dq+C21
478	274
378	417
429	268
364	386
259	529
	391
	281
	237
	383
Group	Mean	± SEM	n	Statistics	F test (variance)	P value	Replication
mCherry+C21	381.6	36.67	5	Two-tailed unpaired t-test	F(8,4) = 1.313, P=0.8432	P=0.5641	No, only one cohort of males and females mixed
hM3Dq+C21	351.8	31.31	9

[truncated: 2 more sheets: Supplementary Fig. 2l, Supplementary Fig. 2m]
