# Supplementary material for: Linking Brain Circuitry and Neural Plasticity in Antidepressant Response: The mPFC-Reuniens-Hippocampus Pathway.
Source: Research Square preprint supplement (doi:10.21203/rs.3.rs-6348176/v1), 2025-04-03
Supplement: Supplementary file 7 [file 9589252a467b8e4c4da1af1c.xlsx]

## Sheet: Supplementary Fig. 7a
	CDM induction + FST test phase
	Immobility time in seconds
	Saline							Ketamine
day1	188	246	109	293	159	218	249	171	186	169	305	267	257	286
day5	430	380	394	495	388	348	413	328	406	454	484	411	408	435
+C21	427	384	456	387	422	384	410	298	302	328	294	306	305	322
Group		Mean	± SEM	n	Statistics	t or F value	P value	Multiple comparison	Replication
Saline	day1	208.857	23.4251	7	Repeated measures ANOVA + Bonferroni Post Hoc test	Time: F (1.600, 19.29) = 72.40 Virus: F (1, 12) = 1.951 Interaction: F (2, 24) = 9.143	Time: P=0,0011 Virus: P=0.1878 Interaction: P=0,0011	day1 vs day5: P=0.0003	Yes, two cohorts combined
	day5	406.857	17.6263	7				day1 vs test: P=0,0020
	test	410	10.2702	7				day5 vs test: P=0.9873
Ketamine	day1	234.429	21.7451	7				day1 vs day5: P=0,0002
	day5	418	18.4739	7				day1 vs test: P=0.0435
	test	307.857	4.73301	7				day5 vs test: P=0,0019

## Sheet: Supplementary Fig. 7b
LTP induction - Ketamine vs Saline
Saline				Ketamine
EPSPs amplitude normalized to baseline				EPSPs amplitude normalized to baseline
time [min]	Mean	SEM		time [min]	Mean	SEM
-5.13341	99.9991	8.12375		-5.13341	103.144	7.83365
-3.37704	104.954	9.14246		-3.37704	100.003	9.72362
-1.6207	95.0466	6.77121		-1.6207	96.8535	6.64709
1.1109	229.007	9.80004		1.1109	228.974	38.8682
2.8673	167.174	16.5619		2.8673	183.521	35.3972
4.62365	158.869	24.1628		4.62365	176.016	21.2483
6.38001	150.454	23.8596		6.38001	164.129	21.3696
8.13637	123.94	21.2162		8.13637	154.078	25.6906
9.89271	101.051	13.4437		9.89271	143.391	22.2764
11.6491	101.161	11.7152		11.6491	153.123	27.4532
13.4054	99.3395	13.1368		13.4054	163.959	26.0617
15.1618	99.8569	11.6867		15.1618	164.867	23.3773
16.9182	98.3594	10.1284		16.9182	174.354	26.561
18.6745	98.3367	9.92807		18.6745	170.457	24.251
20.4309	101.625	9.12282		20.4309	168.441	25.6117
22.1872	107.466	9.8302		22.1872	174.358	25.1549
23.9436	101.461	12.5379		23.9436	174.8	27.9337
25.7	101.337	14.6307		25.7	185.515	27.4132

## Sheet: Supplementary Fig. 7c
LTP comparison - Ketamine vs Saline
LTP group comparison
Saline	Ketamine
96.6958	241.085
142.081	241.604
98.9577	110.821
113.401	176.745
78.6863	203.307
69.6863	71.966
119.601	217.104
Group	Mean	± SEM	n	Statistics	F test (variance)	t value	P value	Replication
Saline	102.7	9.345	7	Two-tailed paired Student's t-test	F(6,6) = 7.065, P=0.3614	t=2.926	P=0.02	Two cohorts of males and females mixed
Ketamine	180.4	24.84	7

## Sheet: Supplementary Fig. 7d
Paired pulse ratio - Ketamine + mPFC -> RE hM4Di
	Ketamine + mPFC -> RE hM4Di
	Paired pulse ratio (EPSP2/EPSP1)
	Baseline	Post-induction
	1.082	2.287
	1.578	1.736
	1.187	1.098
	1.639	1.433
	1.922	1.722
	0.6317	0.9266
	1.84	1.824
	1.062	1.441
Group	Mean	± SEM	n	Statistics	F test (variance)	t value	P value	Replication
BL	1.368	0.158	8	Two-tailed paired Student's t test	-	t=1.163	P=0.2831	Two cohorts of males and females mixed
Min 20-30	1.558	0.1524	8
Paired pulse ratio - Ketamine + mPFC -> RE mCherry
	Ketamine + mPFC -> RE mCherry
	Paired pulse ratio (EPSP2/EPSP1)
	Baseline	Post-induction
	1.437	1.909
	1.949	2.3
	2.042	1.821
	1.949	2.3
	1.444	1.864
	1.39	2.884
	1.961	1.644
	1.301	1.805
Group	Mean	± SEM	n	Statistics	F test (variance)	t value	P value	Replication
BL	1.684	0.1116	8	Two-tailed paired Student's t test	-	t=1.964	P=0.0902	Two cohorts of males and females mixed
Min 20-30	2.066	0.1433	8

## Sheet: Supplementary Fig. 7e
Membrane resistance - Ketamine + mPFC -> RE hM4Di
	Ketamine + mPFC -> RE hM4Di
	Membrane resistance (MOhm)
	Baseline	Post-induction
	89.21	85.23
	93.9	94.83
	113.5	119.7
	106.7	96.72
	113.5	108.3
	133.3	142.3
Group	Mean	± SEM	n	Statistics	F test (variance)	t value	P value	Replication
BL	108.4	6.464	6	Two-tailed paired Student's t test	-	t=0.1711	P=0.8708	Two cohorts of males and females mixed
Min 20-30	107.8	8.431	6
Membrane resistance - Ketamine + mPFC -> RE mCherry
	Ketamine + mPFC -> RE mCherry
	Membrane resistance (MOhm)
	Baseline	Post-induction
	125.8	165.8
	184.7	317.3
	235.3	424.2
	168.2	93.69
	109	93.36
	114.2	92.21
	94.8	90.83
Group	Mean	± SEM	n	Statistics	F test (variance)	t value	P value	Replication
BL	147.4	19.12	7	Two-tailed paired Student's t test	-	t=0.9910	P=0.3600	Two cohorts of males and females mixed
Min 20-30	182.5	51	7
