# Supplementary material for: Linking Brain Circuitry and Neural Plasticity in Antidepressant Response: The mPFC-Reuniens-Hippocampus Pathway.
Source: Research Square preprint supplement (doi:10.21203/rs.3.rs-6348176/v1), 2025-04-03
Supplement: Supplementary file 8 [file a17013261e6cbb0cc0964521.xlsx]

## Sheet: Fig. 1c
Sucrose preference test ratio (percentage of licks from the sucrose bottle).
	Sucrose ratio (percentage of licks from the sucrose bottle).
	mCherry							hM3Dq
naive	99.81	96.09	91.92	100	75.35	99.35	92.78	100	100	98.34	100	99.36
CDM	44.79	48.4	78.98	55.89	64.69	69.65	62.44	50	68.42	55.89	51.47	61.64
+24h	43.35	43.74	64.96	60.39	86.47	63.42	60.39	95.35	99.94	76.99	100	99.76
	mCherry			hM3Dq
	Mean	SEM	N	Mean	SEM	N
naive	93.6143	3.29264	7	99.54	0.324592	5
CDM	60.6914	4.52707	7	57.484	3.40285	5
+24h	60.3886	5.51581	7	94.408	4.44292	5
Group		Mean	± SEM	n	Statistics	t or F value	P value	Multiple comparison	Replication
mCherry	naive	93.6143	3.29264	7	Repeated measures ANOVA + Bonferroni Post Hoc test	time: F (1,529, 15,29) = 37,69 Virus: F (1, 10) = 12,54 Interaction: F (2, 20) = 10,09	time: P<0,0001 Virus: P=0,0053 Interaction: P=0,0009	CDM vs naive: P=0,0088	Yes, two cohorts combined
	CDM	60.6914	4.52707	7				CDM vs 24h: P>0,9999
	+24h	60.3886	5.51581	7
hM3Dq	naive	99.54	0.324592	5				CDM vs naive: P=0,0010
	CDM	57.484	3.40285	5				CDM vs 24h: P=0,0068
	+24h	94.408	4.44292	5

## Sheet: Fig. 1d
CDM induction + FST test phase
	Immobility time in seconds
	mCherry								hM3Dq
day1	204.3	170.1	243.76	155.64	157.41	222.92	270.26	196.69	266.66	114.64	306.1	261.33	122.65	55.44	67.31	366.67	313.33	256.13
day5	291.86	309.28	293.68	235.82	327.93	327.83	281.52	248.98	269.35	201.12	291.53	414.81	408.82	454.39	305.97	333.33	368.63	312.36
+C21	251	300	279	158	364	377	259	244	167	179	172	224	278	316	205	80	188	278
Group		Mean	± SEM	n	Statistics	t or F value	P value	Multiple comparison	Replication
mCherry	day1	202.635	14.6546	8	Repeated measures ANOVA + Bonferroni Post Hoc test	Time: F (1,292, 23,26) = 10,85 Virus: F (1, 18) = 0,5765 Interaction: F (2, 36) = 2,858	Treatment: P=0,0017 Virus: P=0,4575 Interaction: P=0,0705	day1 vs day5: P=0,0118	Yes, two cohorts combined
	day5	289.613	11.9129	8				day1 vs +C21: p=0,1652
	+C21	279	24.756	8				day5 vs +C21: P>0,99999
hM3Dq	day1	196.381	32.0637	12				day1 vs day5: P=0,0366
	day5	324.012	21.8472	12				day1 vs +C21: P>0,9999
	+C21	203.583	18.4738	12				day5 vs +C21: P=0,0003

## Sheet: Fig. 1e
Tail Suspension Test
Immobility time in seconds
hM3Dq +C21	mCherry +C21
46	145
36.6	208
38	146
41	121
23.6	169
59
Group	Mean	± SEM	n	Statistics	F test (variance)	t value	P value	Replication
mCherry	157.8	14.67	5	Two-tailed Welch's t test	F(4,5) = 7.914, P=0.0434	t=7,594	P=0,0007	No, one cohort (male and females)
hM3Dq	40.7	4.759	6

## Sheet: Fig. 1f
Activity in intellicage (number of corner visits)
	mCherry						hM3Dq
naive	207	206	198	98	126	265	292	255	95	92	237
CDM	269	208	243	208	66	242	212	225	210	210	223
+24h	259	152	168	222	154	216	224	158	193	210	260
	mCherry			hM3Dq
	Mean	SEM	N	Mean	SEM	N
naive	183.333333	24.85111220	6	194.2	42.05876841	5
CDM	206	29.57589108	6	216	3.30151480	5
+24h	195.166667	17.81837379	6	209	16.85823241	5
Group		Mean	± SEM	n	Statistics	t or F value	P value	Multiple comparison	Replication
mCherry	naive	183.333333	24.85111220	6	Repeated measures ANOVA + Bonferroni Post Hoc test	time: F (1.587, 14.28) = 0.5449 Virus: F (1, 9) = 0.1952 Interaction: F (2, 18) = 0.004397	time: P=0.5519 Virus: P=0.6690 Interaction: P=0.9956	naive vs CDM: P>0.9999 naive vs 24h: P>0.9999	Yes, two cohorts - both sexes combined
	CDM	206	29.57589108	6
	+24h	195.166667	17.81837379	6
hM3Dq	naive	194.2	42.05876841	5				naive vs CDM: P>0.9999 naive vs 24h: P>0.9999
	CDM	216	3.30151480	5
	+24h	209	16.85823241	5

## Sheet: Fig. 1g
Locomotion – Open field test
Distance travelled in OFT (m)
mCherry + C21	hM3Dq +C21
46.0946	39.6903
38.3771	55.6221
41.2659	39.3136
63.4296	42.2999
48.0845	32.62
	45.0875
Group	Mean	± SEM	n	Statistics	F test (variance)	t value	P value	Replication
mCherry + C21	47.45	4.348	5	Two-tailed unpaired t test	F(4,5) = 1.605, p=0.6103	t=0.9573	P=0.3634	No, one cohort (male and female)
hM3Dq +C21	42.44	3.133	6

## Sheet: Fig. 1h
Open Field Test - Time in center
Time in center (seconds)
mCherry +C21	hM3Dq +C21
252166	163.5
223833	125933
240033	194.4
230.6	226366
188133	168433
230033
Group	Mean	± SEM	n	Statistics	F test (variance)	t value	P value	Replication
mCherry +C21	175.7	16.73	5	Two-tailed unpaired t test	F(4,5) = 2.983, p=0.2618	t=2.877	P=0.0183	No, one cohort (male and female)
hM3Dq +C21	227.5	8841	6

## Sheet: Fig. 1i
Novel object exploration task
Time spent exploring both objects (Normalized to mCherry+C21)
mCherry+C21	hM3Dq+C21
0.92465753	1.25342466
0.4109589	1.00684931
2.09589041	2.83561644
1.45890411	1.39726027
0.78082192	0.92465753
0.55479452	2.63013698
1.0890411	0.59589041
0.88356164	2.15753425
0.80136986	1.97260274
1.1215198	1.84931507
0.77689557	1.95205479
0.93227373	0.80136986
1.1633545	2.63746292
1.00598151	1.88049057
	0.91833082
	3.55181065
	4.37850649
Group	Mean	± SEM	n	Statistics	F test (variance)	t value	P value	Replication
mCherry+C21	1.000	0.1091	14	Two-tailed Welch's t test	F(16,13) = 6.441, p=0.0016	t=3.380	P=0.0027	Yes, two cohorts - both sexes combined
hM3Dq+C21	1.926	0.2513	17

## Sheet: Fig. 1j
Social preference in a 3 chamber task
Sociability (ratio time spent interacting with conspecific versus object)
mCherry+C21	hM3Dq+C21
4.810888	3.649529
6.541899	4.58498
4.128731	8.055364
1.565719	6.923192
3.549332	10.16579
5.003618	5.771309
6.447152	7.101771
	10.70416
Group	Mean	± SEM	n	Statistics	F test (variance)	t value	P value	Replication
mCherry+C21	4.578	0.6532	7	Two-tailed unpaired t test	F(7,6) = 2.072, p=0.3932	t=2.262	P=0.0415	Yes, two cohorts - both sexes combined
hM3Dq+C21	7.120	0.8796	8
