# Supplementary material for: Linking Brain Circuitry and Neural Plasticity in Antidepressant Response: The mPFC-Reuniens-Hippocampus Pathway.
Source: Research Square preprint supplement (doi:10.21203/rs.3.rs-6348176/v1), 2025-04-03
Supplement: Supplementary file 9 [file b6509ff5cb125647fadd117c.xlsx]

## Sheet: Fig. 5d
CDM induction + FST test phase
	Immobility time in seconds
	hM4Di RE								hM3Dq mPFC+ hM4Di RE								hM3Dq mPFC+ mcherry RE
day1	88	148	80	132	125	151	205	240	88	155	97	105	142	113	152	133	122	201	188	67	141	131	67	155
day5	250	262	310	392	363	266	314	252	269	275	376	312	306	395	429	193	256	322	300	242	241	277	255	385
+C21	235	238	325	420	400	362	454	265	239	244	323	298	330	351	363	186	101	173	179	203	220	103	63	360
Group		Mean	± SEM	n	Statistics	t or F value	P value	Multiple comparison	Replication
hM4Di RE	day1	158	17.7059	8	Repeated measures ANOVA + Bonferroni Post Hoc test	Time: F (1,573, 33,03) = 65,56 Virus: F (2, 21) = 4,242 Interaction: F (4, 42) = 5,905	Time: P<0.0001 Virus: P=0.0284 Interaction: P=0.0007	day1 vs day5: P=0,0081	Yes, two cohorts combined
	day5	301.125	18.9562	8				day1 vs +C21: p=0,0061
	+C21	337.375	30.0903	8				day5 vs +C21: P>0,3233
hM3Dq mPFC+ hM4Di RE	day1	123.125	9.11325	8				day1 vs day5: P=0,0008
	day5	319.375	27.273	8				day1 vs +C21: P>0,0005
	+C21	291.75	22.0841	8				day5 vs +C21: P=0,0864
hM3Dq mPFC+ hM4Di RE	day1	134	17.4366	8				day1 vs day5: P<0,0001
	day5	284.75	17.5171	8				day1 vs +C21: p=0,6916
	+C21	175.25	32.8028	8				day5 vs +C21: P=0,0095

## Sheet: Fig. 5e
OFT - Time spent in center
Time spent in center (s)
hM3Dq mPFC+ mCherry RE	hM3Dq mPFC + hM4Di RE	hM4Di RE
102.667	74.4999	175
180.366	166.466	144.2
141.033	61.5999	151.3
182	96.7999	123.1
143.833	115.8	142.167
248.366	156.4	126.133
194.733	116	142.767
215.2	70.8333	181.366
Group	Mean	± SEM	n	Statistics	F value	P value	MUltiple comparison	Replication
hM3Dq mPFC+ mCherry RE	176	16.26	8	One-way ANOVA, Tukey's post-hoc test	F=7.044	P=0.0046	hM3Dq mPFC+ mCherry RE vs. hM3Dq mPFC+ hM4Di RE: P=0.0034	Yes, two cohorts males and females mixed
hM3Dq mPFC + hM4Di RE	107.3	13.8	8				hM3Dq mPFC + hM4Di RE vs hM4Di RE : P=0.3077
hM4Di RE	148.3	7.352	8				hM4Di RE vs hM3Dq mPFC+ mCherry RE: P=0.0903

## Sheet: Fig. 5f
Novel object exploration task
Time spent exploring two novel objects (normalized to hM3Dq mPFC + mCherry RE)
hM3Dq mPFC+ mCherry RE	hM3Dq mPFC + hM4Di RE	hM4Di RE
102.667	74.4999	175
180.366	166.466	144.2
141.033	61.5999	151.3
182	96.7999	123.1
143.833	115.8	142.167
248.366	156.4	126.133
194.733	116	142.767
215.2	70.8333	181.366
Group	Mean	± SEM	n	Statistics	F value	P value	Multiples comparison	Replication
hM4Di RE	0.510	0.0781	7	One-way ANOVA	F=4.776	P=0.0202	hM3Dq mPFC+ mCherry RE vs. hM3Dq mPFC+ hM4Di RE: P=0.0417	Yes, two cohorts males and females mixed
hM3Dq mPFC+ hM4Di RE	0.541	0.1091	8				hM3Dq mPFC + hM4Di RE vs hM4Di RE : P=0.9837
hM3Dq mPFC+ mcherry RE	1.000	0.1654	8				hM4Di RE vs hM3Dq mPFC+ mCherry RE: P=0.0350

## Sheet: Fig. 5g
LTP induction
hM3Dq mPFC+ mCherry RE				hM3Dq mPFC + hM4Di RE
EPSPs amplitude normalized to baseline				EPSPs amplitude normalized to baseline
time [min]	Mean	SEM		time [min]	Mean	SEM
-5.13341	92.9249	13.0907		-5.13341	98.0011	9.73648
-3.37704	101.026	14.3958		-3.37704	98.7876	12.1293
-1.6207	106.049	13.7818		-1.6207	103.211	11.873
1.1109	179.491	25.4416		1.1109	153.655	21.6789
2.8673	120.551	14.1291		2.8673	110.663	14.2342
4.62365	111.137	16.6143		4.62365	114.787	15.4085
6.38001	109.696	11.5773		6.38001	108.744	16.452
8.13637	126.393	17.5467		8.13637	100.357	15.4185
9.89271	129.842	16.8862		9.89271	102.47	16.502
11.6491	131.149	15.0462		11.6491	99.9662	15.8628
13.4054	144.14	22.1673		13.4054	102.268	16.9882
15.1618	142.636	18.4907		15.1618	96.255	17.1488
16.9182	147	22.1616		16.9182	99.1219	17.7867
18.6745	145.4	24.3469		18.6745	103.891	17.5394
20.4309	145.46	23.0578		20.4309	109.915	18.6246
22.1872	147.497	19.0662		22.1872	105.454	18.2096
23.9436	156.704	26.4996		23.9436	106.458	19.8407
25.7	152.454	23.6264		25.7	103.128	17.9776
27.4563	156.485	21.9974		27.4563	106.553	17.1687
29.2127	157.735	19.7041		29.2127	107.464	17.1867
30.969	163.242	22.6686		30.969	119.02	21.772

## Sheet: Fig. 5h
LTP comparison -hM3Dq mPFC+ mCherry RE vs hM3Dq mPFC + hM4Di RE
LTP group comparison
hM3Dq mPFC+ mCherry RE	hM3Dq mPFC + hM4Di RE
71.196	116.083
70.4465	193.379
88.9344	79.7899
116.873	229.233
58.3364	216.081
105.364	157.286
81.1631
185.316
211.901
55.8967
125.146
102.904
Group	Mean	± SEM	n	Statistics	F test (variance)	t value	P value	Replication
hM3Dq mPFC+ mCherry RE	99.74	8739	6	Two-tailed unpaired Student's t test	F(5,11) = 1.415, P=0.5629	t=2.272	P=0.0372	Two cohorts of males and females mixed
hM3Dq mPFC + hM4Di RE	131.9	6090	12
