# Supplementary material for: Linking Brain Circuitry and Neural Plasticity in Antidepressant Response: The mPFC-Reuniens-Hippocampus Pathway.
Source: Research Square preprint supplement (doi:10.21203/rs.3.rs-6348176/v1), 2025-04-03
Supplement: Supplementary file 10 [file be4927439564005480acf3fd.xlsx]

## Sheet: Supplementary Fig. 5a
mRNA expression - dHIP - Acute
cFos
mRNA expression (normalized to ApoE; GAPDH)
Saline	C21
1.198	1.007
1.04	1.817
0.928	1.06
0.873	0.858
1.092	1.343
0.995	0.798
Group	Mean	± SEM	n	Statistics	F test (variance)	t value	P value	Replication
Saline	1021	0.04760	6	Two-tailed Welch's t test	F(5,5) = 10.59, P=0.0216	t=0.7786, df=5.936	P=0.4661	Two cohorts of males and females mixed
C21	1147	0.1549	6
mRNA expression - dHIP - Acute
Homer1a
mRNA expression (normalized to ApoE; GAPDH)
Saline	C21
0.843	1.233
1.059	0.704
1.165	1.063
0.933	1.345
0.801	0.767
1.178	1.16
Group	Mean	± SEM	n	Statistics	F test (variance)	t value	P value	Replication
Saline	0.9965	0.06609	6	Two-tailed Student's t test	F(5,5) = 2.537, P=0.3300	t=0.3929, df=10	P=0.7027	Two cohorts of males and females mixed
C21	1045	0.1053	6
mRNA expression - dHIP - Acute
NPAS4
mRNA expression (normalized to ApoE; GAPDH)
Saline	C21
0.93	1.161
0.986	0.839
1.072	1.144
1.011	1.333
0.947	0.963
1.027	1.144
Group	Mean	± SEM	n	Statistics	F test (variance)	t value	P value	Replication
Saline	0.9955	0.02146	6	Two-tailed Welch's t test	F(5,5) = 10.76, P=0.0208	t=1.383, df=5.921	P=0.2164	Two cohorts of males and females mixed
C21	1097	0.07041	6
mRNA expression - dHIP - Acute
Arc
mRNA expression (normalized to ApoE; GAPDH)
Saline	C21
0.891	1.108
1.104	1.127
0.98	0.765
1.025	1.472
0.944	1.498
1.059	1.017
Group	Mean	± SEM	n	Statistics	F test (variance)	t value	P value	Replication
Saline	1001	0.03180	6	Two-tailed Welch's t test	F(5,5) = 12.91, P=0.0139	t=1.383, df=5.770	P=0.2179	Two cohorts of males and females mixed
C21	1165	0.1143	6

## Sheet: Supplementary Fig. 5b
mRNA expression - vHIP - Acute
cFos
mRNA expression (normalized to ApoE; GAPDH)
Saline	C21
1.203	0.82
0.841	1.392
0.938	0.921
1.018	0.785
1.084	1.333
1.05	0.882
Group	Mean	± SEM	n	Statistics	F test (variance)	t value	P value	Replication
Saline	1022	0.05074	6	Two-tailed Student's t test	F(5,5) = 4.667, P=0.1162	t=0.001380	P=0.9989	Two cohorts of males and females mixed
C21	1022	0.1096	6
mRNA expression - vHIP - Acute
Homer1a
mRNA expression (normalized to ApoE; GAPDH)
Saline	C21
0.942	0.758
0.925	0.969
1.163	0.539
0.97	1.003
1.346	1.283
0.747	0.714
Group	Mean	± SEM	n	Statistics	F test (variance)	t value	P value	Replication
Saline	1016	0.08539	6	Two-tailed Student's t test	F(5,5) = 1.573, P=0.6311	t=1.006	P=0.3380	Two cohorts of males and females mixed
C21	0.8777	0.1071	6
mRNA expression - vHIP - Acute
NPAS4
mRNA expression (normalized to ApoE; GAPDH)
Saline	C21
0.977	0.598
0.966	0.968
0.985	0.971
1.072	0.707
1.13	1.145
0.823	1.148
Group	Mean	± SEM	n	Statistics	F test (variance)	t value	P value	Replication
Saline	0.9922	0.04280	6	Two-tailed Student's t test	F(5,5) = 4.668, P=0.1162	t=0.6804	P=0.5117	Two cohorts of males and females mixed
C21	0.9228	0.09247	6
mRNA expression - vHIP - Acute
Arc
mRNA expression (normalized to ApoE; GAPDH)
Saline	C21
1.12	1.071
0.92	1.282
0.831	0.961
1.128	1.273
1.22	1.161
0.88	0.87
Group	Mean	± SEM	n	Statistics	F test (variance)	t value	P value	Replication
Saline	1017	0.06504	6	Two-tailed Student's t test	F(5,5) = 1.101, P=0.9182	t=0.9174	P=0.3805	Two cohorts of males and females mixed
C21	1103	0.06826	6

## Sheet: Supplementary Fig. 5c
mRNA expression - dHIP - Overnight
cFos
mRNA expression (normalized to ApoE; GAPDH)
hM3Dq	hM3Dq + C21
0.855802	0.805342
1.332	1.26758
0.988105	1.26251
1.0135	1.48695
0.747948	1.23315
1.06265	1.08237
Group	Mean	± SEM	n	Statistics	F test (variance)	t value	P value	Replication
hM3Dq	1000	0.08140	6	Two-tailed Student's t test	F(5,5) = 1.312, P=0.7729	t=1.532, df=10	P=0.1565	Two cohorts of males and females mixed
hM3Dq +C21	1190	0.09325	6
		,
mRNA expression - dHIP - Overnight
Homer1a
mRNA expression (normalized to ApoE; GAPDH)
hM3Dq	hM3Dq + C21
1.27575	1.11042
0.976434	1.15409
1.06734	1.14318
0.960882	1.05345
0.772884	0.822079
0.946712	1.25487
Group	Mean	± SEM	n	Statistics	F test (variance)	t value	P value	Replication
hM3Dq	1000	0.06760	6	Two-tailed Student's t test	F(5,5) = 1.273, P=0.7973	t=0.9929	P=0.3442	Two cohorts of males and females mixed
hM3Dq +C21	1090	0.05990	6
mRNA expression - dHIP - Overnight
NPAS4
mRNA expression (normalized to ApoE; GAPDH)
hM3Dq	hM3Dq + C21
0.912241	0.907201
1.36113	0.946427
1.13798	1.16214
0.721719	1.01328
0.842462	1.37256
1.02447	1.18254
Group	Mean	± SEM	n	Statistics	F test (variance)	t value	P value	Replication
hM3Dq	1000	0.09310	6	Two-tailed Student's t test	F(5,5) = 1.697, P=0.5757	t=0.8295	P=0.4262	Two cohorts of males and females mixed
hM3Dq +C21	1097	0.07146	6
mRNA expression - dHIP - Overnight
Arc
mRNA expression (normalized to ApoE; GAPDH)
hM3Dq	hM3Dq + C21
1.07634	1.22696
1.20467	0.920069
0.93653	0.859329
0.899921	0.992446
0.837433	1.35294
1.0451	1.05712
Group	Mean	± SEM	n	Statistics	F test (variance)	t value	P value	Replication
hM3Dq	1000	0.05484	6	Two-tailed Student's t test	F(5,5) = 1.970, P=0.4748	t=0.7211	P=0.4874	Two cohorts of males and females mixed
hM3Dq +C21	1068	0.07697	6

## Sheet: Supplementary Fig. 5d
mRNA expression - vHIP - Overnight
cFos
mRNA expression (normalized to ApoE; GAPDH)
hM3Dq	hM3Dq + C21
1.09962	2.31191
0.937196	1.81931
1.59545	1.03022
0.673308	1.91253
0.773936	1.23895
0.920493	1.7279
Group	Mean	± SEM	n	Statistics	F test (variance)	t value	P value	Replication
hM3Dq	1000	0.1332	6	Two-tailed Student's t test	F(5,5) = 2.050, P=0.4497	t=2.894	P=0.0160	Two cohorts of males and females mixed
hM3Dq +C21	1673	0.1907	6
		,
mRNA expression - vHIP - Overnight
Homer1a
mRNA expression (normalized to ApoE; GAPDH)
hM3Dq	hM3Dq + C21
0.956022	1.39158
0.914772	1.38536
1.24792	1.46518
0.976454	1.26015
0.96525	1.21044
0.939582	1.49706
Group	Mean	± SEM	n	Statistics	F test (variance)	t value	P value	Replication
hM3Dq	1000	0.05036	6	Two-tailed Student's t test	F(5,5) = 1.200, P=0.8465	t=5.401	P=0.0003	Two cohorts of males and females mixed
hM3Dq +C21	1368	0.04598	6
mRNA expression - vHIP - Overnight
NPAS4
mRNA expression (normalized to ApoE; GAPDH)
hM3Dq	hM3Dq + C21
1.26264	1.51862
0.776451	1.75404
0.975999	1.47481
0.761043	1.57226
1.14425	1.18728
1.07962	1.32185
Group	Mean	± SEM	n	Statistics	F test (variance)	t value	P value	Replication
hM3Dq	1000	0.08242	6	Two-tailed Student's t test	F(5,5) = 1.043, P=0.9643	t=4.087	P=0.0022	Two cohorts of males and females mixed
hM3Dq +C21	1471	0.08070	6
mRNA expression - vHIP - Overnight
Arc
mRNA expression (normalized to ApoE; GAPDH)
hM3Dq	hM3Dq + C21
1.31944	2.06157
1.27761	2.74626
0.967481	2.042
0.719233	2.00348
0.740879	1.94012
0.975355	1.49075
Group	Mean	± SEM	n	Statistics	F test (variance)	t value	P value	Replication
hM3Dq	1000	0.1044	6	Two-tailed Student's t test	F(5,5) = 2.485, P=0.3405	t=5.376	P=0.0003	Two cohorts of males and females mixed
hM3Dq +C21	2047	0.1645	6

## Sheet: Supplementary Fig. 5f
Synaptic quantification - mPFC
			mPFC										mPFC
			VGLUT2 puncta density (number /µm³)										VGLUT2 puncta mean volume (µm³)
			mCherry + C21	hM3Dq + C21									mCherry + C21	hM3Dq + C21
			0.0158573	0.0125728									0.190126	0.256556
			0.0107612	0.0134655									0.303135	0.234567
			0.013525	0.0140755									0.239771	0.213359
			0.00881953	0.0179627									0.395	0.166775
			0.00728327	0.0136106									0.487945	0.236006
			0.00897948	0.0157048									0.380924	0.191915
			0.0127364	0.0150315									0.262407	0.203431
				0.00902784										0.384002
Group	Mean	± SEM	n	Statistics	F test (variance)	t value	P value	Replication		Group	Mean	± SEM	n	Statistics	F test (variance)	t value	P value	Replication
mCherry + C21	0.01114	0.001150	7	Two-tailed Student's t test	F(6,7) = 1.384, P=0.6754	t=1.923	P=0.0766	One cohort of males and females mixed		mCherry + C21	0.3228	0.03916	7	Two-tailed Student's t test	F(6,7) = 2.452, P=0.2659	t=1.965,	P=0.0712	One cohort of males and females mixed
hM3Dq + C21	0.01393	0.0009145	8							hM3Dq + C21	0.2358	0.02339	8
			mPFC										mPFC
			GAD65 puncta density (number /µm³)										GAD65 puncta mean volume (µm³)
			mCherry + C21	hM3Dq + C21									mCherry + C21	hM3Dq + C21
			0.0141834	0.013101									0.629399	0.621289
			0.0146893	0.00999497									0.79462	0.557534
			0.0166794	0.00197147									0.834548	0.534701
			0.00886417	0.0157978									0.556084	0.93639
			0.00799003	0.0128629									0.680156	0.73151
			0.00909107	0.00508118									0.707219	0.722923
			0.00965648	0.0142095									0.602666	0.859216
			0.0157383	0.0117842									0.722152	0.564884
Group	Mean	± SEM	n	Statistics	F test (variance)	t value	P value	Replication		Group	Mean	± SEM	n	Statistics	F test (variance)	t value	P value	Replication
mCherry + C21	0.01211	0.001251	8	Two-tailed Student's t test	F(7,7) = 1.804, P=0.4544	t=0.7214	P=0.4825	One cohort of males and females mixed		hM3Dq + C21	0.6909	0.03341	8	One-tailed Student's t test	F(7,7) = 2.467, P=0.2564	t=0.003219	P=0.4987	One cohort of males and females mixed
hM3Dq + C21	0.01060	0.001680	8							mCherry + C21	0.6911	0.05247	8

## Sheet: Supplementary Fig. 5g
Mean VGLUT1 volume - Hippocampus			Mean VGLUT1 volume - Hippocampus
			Dorsal Hippocampus										Ventral Hippocampus
			VGLUT1 puncta mean volume (µm³)										VGLUT1 puncta mean volume (µm³)
			mCherry + C21	hM3Dq + C21									mCherry + C21	hM3Dq + C21
			0.224201	0.164904									0.207585	0.184743
			0.151662	0.115553									0.190103	0.137594
			0.188738	0.135431									0.204107	0.173758
			0.133469	0.0823532									0.160111	0.0831188
			0.144891	0.125724									0.142849	0.143187
				0.181838										0.126622
				0.115305										0.143674
				0.143979										0.172285
Group	Mean	± SEM	n	Statistics	F test (variance)	t value	P value	Replication		Group	Mean	± SEM	n	Statistics	F test (variance)	t value	P value	Replication
mCherry + C21	0.1686	0.01670	5	Two-tailed Student's t test	F(4,7) = 1.444, P=0.6290	t=1.857	P=0.0903	One cohort of males and females mixed		mCherry + C21	0.1810	0.01268	5	Two-tailed Student's t test	F(7,4) = 1.311, P=0.8374	t=1.997	P=0.0711	One cohort of males and females mixed
hM3Dq + C21	0.1331	0.01099	8							hM3Dq + C21	0.1456	0.01148	8

## Sheet: Supplementary Fig. 5h
Mean VGLUT2 volume - Hippocampus										Mean VGLUT2 volume - Hippocampus
			Dorsal Hippocampus										Ventral Hippocampus
			VGLUT2 puncta mean volume (µm³)										VGLUT2 puncta mean volume (µm³)
			mCherry + C21	hM3Dq + C21									mCherry + C21	hM3Dq + C21
			0.556	0.613									0.592	0.623
			0.578	0.566									0.594	0.594
			0.642	0.574									0.672	0.58
			0.569	0.583									0.582	0.58
			0.688	0.595									0.754	0.605
			0.694	0.564									0.777	0.599
			0.576	0.629									0.6	0.66
			0.603	0.566									0.602	0.598
Group	Mean	± SEM	n	Statistics	F test (variance)	t value	P value	Replication		Group	Mean	± SEM	n	Statistics	F test (variance)	t value	P value	Replication
mCherry + C21	0.6133	0.01932	8	Two-tailed Welch's t test	F(7,7) = 5.105, P=0.0472	t=1.278	P=0.2312	One cohort of males and females mixed		mCherry + C21	0.6466	0.02780	8	Mann-Whitney test	-	-	P=0.3953	One cohort of males and females mixed
hM3Dq + C21	0.5863	0.008552	8							hM3Dq + C21	0.6049	0.009263	8

## Sheet: Supplementary Fig. 5i
Mean GAD65 volume - Hippocampus
			Dorsal Hippocampus										Ventral Hippocampus
			GAD65 puncta mean volume (µm³)										GAD65 puncta mean volume (µm³)
			mCherry + C21	hM3Dq + C21									mCherry + C21	hM3Dq + C21
			0.340297	0.422524									0.344668	0.409682
			0.295532	0.444763									0.328191	0.401103
			0.31162	0.276361									0.330849	0.26371
			0.223756	0.409771									0.43966	0.273744
			0.635533	0.282893									0.384156	0.44094
			0.532174	0.286118									0.335923	0.50924
			0.318051	0.287302									0.324456	0.364152
			0.265352	0.314067									0.367313	0.329557
Group	Mean	± SEM	n	Statistics	F test (variance)	t value	P value	Replication		Group	Mean	± SEM	n	Statistics	F test (variance)	t value	P value	Replication
hM3Dq + C21	0.3653	0.05027	8	Mann-Whitney test			P=0.8785	One cohort of males and females mixed		mCherry + C21	0.3569	0.01392	8	Mann-Whitney test	-	-	P=0.6454	One cohort of males and females mixed
mCherry + C21	0.3405	0.02547	8							hM3Dq + C21	0.3740	0.02960	8
