# Supplementary material for: Linking Brain Circuitry and Neural Plasticity in Antidepressant Response: The mPFC-Reuniens-Hippocampus Pathway.
Source: Research Square preprint supplement (doi:10.21203/rs.3.rs-6348176/v1), 2025-04-03
Supplement: Supplementary file 11 [file cb93fb0f941d03d87c418fb8.xlsx]

## Sheet: Fig. 3c
LTP induction - CDM versus naive
Naive				CDM
EPSPs amplitude normalized to baseline				EPSPs amplitude normalized to baseline
time [min]	Mean	SEM		time [min]	Mean	SEM
-5.13341	97.4743	8.90197		-5.13341	104.263	7.52304
-3.37704	99.4483	9.9955		-3.37704	96.3456	6.87946
-1.6207	103.077	9.75256		-1.6207	99.391	8.09652
1.1109	150.211	12.7943		1.1109	132.669	15.0756
2.8673	107.039	10.2685		2.8673	107.068	8.14831
4.62365	109.995	11.9503		4.62365	113.908	9.98912
6.38001	105.018	9.3371		6.38001	113.816	12.7001
8.13637	115.939	12.3268		8.13637	113.292	12.831
9.89271	124.567	10.7		9.89271	113.654	13.8926
11.6491	120.151	11.7379		11.6491	113.138	11.0352
13.4054	139.828	18.4419		13.4054	116.03	10.6909
15.1618	134.811	14.4122		15.1618	114.892	11.1225
16.9182	140.968	16.0935		16.9182	107.115	9.51059
18.6745	148.188	20.1679		18.6745	108.888	13.3519
20.4309	157.879	20.3509		20.4309	108.634	11.9286
22.1872	155.601	18.4982		22.1872	103.534	13.1029
23.9436	156.021	19.76		23.9436	110.448	15.7844
25.7	161.625	21.1132		25.7	111.131	14.4397
27.4563	151.599	19.5033		27.4563	121.159	19.8005
29.2127	167.074	20.2413		29.2127	107.369	16.3157

## Sheet: Fig. 3d
LTP comparison - CDM versus naive
	LTP group comparison
	Naive	CDM
	121.952	118.577
	101.733	96.4741
	179.839	195.584
	161.551	90.6609
	188.584	125.061
	160.84	170.624
	158.171	87.0304
	182.477	34.3015
	150.254	132.588
	161.534	111.947
		68.7009
Group	Mean	± SEM	n	Statistics	F test (variance)	t value	P value	Replication
Naive	156.7	8533	10	Two-tailed Student's t test	F(10,9) = 2.787, P=0.1385	t=2.724	P=0.0135	Two cohorts of males and females mixed
CDM	112.0	13.58	11

## Sheet: Fig. 3e
LTP induction - mCherry + C21 vs hM3Dq + C21
mCherry + C21				hM3Dq + C21
EPSPs amplitude normalized to baseline				EPSPs amplitude normalized to baseline
time [min]	Mean	SEM		time [min]	Mean	SEM
-5.13341	98.5096	7.1261		-5.13341	98.3917	10.2936
-3.37704	101.384	8.72907		-3.37704	100.374	10.0856
-1.6207	100.106	7.54465		-1.6207	101.235	11.0532
1.1109	140.775	13.6921		1.1109	148.477	16.779
2.8673	103.359	11.8704		2.8673	119.522	16.9451
4.62365	98.0537	9.52001		4.62365	117.699	17.752
6.38001	92.4474	8.72495		6.38001	116.392	16.7953
8.13637	84.942	8.22578		8.13637	122.018	17.1756
9.89271	98.245	17.3383		9.89271	126.879	19.1052
11.6491	90.867	11.4866		11.6491	132.701	18.8122
13.4054	90.6644	12.376		13.4054	135.935	19.7109
15.1618	93.2873	12.9114		15.1618	131.621	18.5965
16.9182	91.1217	12.4168		16.9182	130.848	17.9735
18.6745	92.2986	11.1396		18.6745	131.854	18.1888
20.4309	97.5912	12.6622		20.4309	141.463	17.9171
22.1872	101.866	14.0783		22.1872	139.667	17.3783
23.9436	97.7716	13.7122		23.9436	146.16	18.3917
25.7	102.042	14.007		25.7	148.797	17.9998
27.4563	100.441	12.4774		27.4563	153.357	19.1051

## Sheet: Fig. 3f
LTP comparison - mCherry + C21 vs hM3Dq + C21
	LTP group comparison
	mCherry + C21	hM3Dq + C21
	54.2582	110.677
	106.55	115.506
	113.254	131.446
	129.268	139.499
	93.7211	103.492
	101.19	136.707
	99.9223	123.501
		115.323
		134.417
		159.615
		137.542
		193.393
		118.316
		126.861
Group	Mean	± SEM	n	Statistics	F test (variance)	t value	P value	Replication
mCherry + C21	99.74	8739	7	Mann-Whitney test	-	-	P=0.0023	Two cohorts of males and females mixed
hM3Dq + C21	131.9	6090	14
