# Supplementary material for: Linking Brain Circuitry and Neural Plasticity in Antidepressant Response: The mPFC-Reuniens-Hippocampus Pathway.
Source: Research Square preprint supplement (doi:10.21203/rs.3.rs-6348176/v1), 2025-04-03
Supplement: Supplementary file 12 [file e9b1a596fe395f94b6a25757.xlsx]

## Sheet: Supplementary Fig. 4a
Excitatory neurons - Struggle
	Mean peak amplitude (deltaF/F)
	CDM	+C21
	6.397	6.438
	2.992	4.259
	6.411	6.16
	7.2	6.706
	2.237	1.799
	4.586	5.702
Group	Mean	± SEM	n	Statistics	F test (variance)	t value	P value	Replication
CDM	4.971	0.8290	6	Paired t test	-	t=0.6440	P=0.5480	Two cohorts of males and females mixed
+C21	5.177	0.7621	6
Excitatory neurons - Immobile
	Mean peak amplitude (deltaF/F)
	CDM	+C21
	3.054	4.801
	5.147	3.826
	5.147	6.83
	4.36	5.889
	1.874	1.706
	4.091	4.344
Group	Mean	± SEM	n	Statistics	F test (variance)	t value	P value	Replication
CDM	3.946	0.5217	6	Paired t test	-	t=1.221	P=0.2766	Two cohorts of males and females mixed
+C21	4.566	0.7236	6

## Sheet: Supplementary Fig. 4b
Inhibitory neurons - Struggle
	Mean peak amplitude (deltaF/F)
	CDM	+C21
	1.0525	2.17152
	1.07004	2.12271
	0.59692	0.721444
	1.26601	1.46314
	1.00355	1.29195
Group	Mean	± SEM	n	Statistics	F test (variance)	t value	P value	Replication
CDM	0.9978	0.1097	5	Two-tailed paired t-test	-	t=2.552	P=0.0631	Two cohorts of males and females mixed
+C21	1.554	0.2716	5
Inhibitory neurons - Immobile
	Mean peak amplitude (deltaF/F)
	CDM	+C21
	1.06155	2.02788
	1.05171	1.86712
	0.726638	0.597805
	1.01219	0.980133
	0.968067	0.907553
Group	Mean	± SEM	n	Statistics	F test (variance)	t value	P value	Replication
CDM	0.9640	0.06160	5	Two-tailed paired t-test	-	t=1.311	P=0.2600	Two cohorts of males and females mixed
+C21	1.276	0.2827	5
