# Supplementary material for: Linking Brain Circuitry and Neural Plasticity in Antidepressant Response: The mPFC-Reuniens-Hippocampus Pathway.
Source: Research Square preprint supplement (doi:10.21203/rs.3.rs-6348176/v1), 2025-04-03
Supplement: Supplementary file 13 [file f6a26d05d4b0e89b82902811.xlsx]

## Sheet: Fig. 4b
Excitatory neurons - Escape bout
	Max peak amplitude (deltaF/F)
	CDM	+C21
	3.68989	6.15529
	0.409449	1.73299
	1.46492	2.98045
	4.38244	5.0473
	0.630075	1.25631
	1.46704	3.1534
Group	Mean	± SEM	n	Statistics	F test (variance)	t value	P value	Replication
Day 4	2.007	0.6710	6	Paired t test	-	t=4.908	P=0.0044	Two cohorts of males and females mixed
Day 6	3.388	0.7728	6
	AUC
	CDM	+C21
	6.41946	10.6922
	0.361087	1.91581
	2.27642	6.9088
	10.1246	12.1531
	0.935794	2.56751
	1.66693	4.57762
Group	Mean	± SEM	n	Statistics	F test (variance)	t value	P value	Replication
Day 4	3.631	1.566	6	Paired t test	-	t=5.171	P=0.0036	Two cohorts of males and females mixed
Day 6	6.469	1.731	6

## Sheet: Fig. 4c
Excitatory neurons - Immobility bout
	Min peak amplitude (deltaF/F)
	CDM	+C21
	-2.21741	-6.53904
	-0.23403	-0.834697
	-1.89907	-2.27688
	-1.38901	-2.22683
	-0.904978	-1.38433
	-0.587287	-2.00309
Group	Mean	± SEM	n	Statistics	F test (variance)	t value	P value	Replication
CDM	-1.205	0.3138	6	Wilcoxon signed rank test	-	-	P=0.0313	Two cohorts of males and females mixed
+C21	-2.544	0.8305	6
	AUC
	CDM	+C21
	-3.55796	-8.99216
	-0.0877605	-1.39614
	-2.96407	-3.49131
	-1.99684	-3.35408
	-1.32928	-2.03324
	-0.136797	-2.39115
Group	Mean	± SEM	n	Statistics	F test (variance)	t value	P value	Replication
CDM	-1.679	0.5864	6	Wilcoxon signed rank test	-	-	P=0.0313	Two cohorts of males and females mixed
+C21	-3.610	1.124	6

## Sheet: Fig. 4d
Inhibitory neurons - Escape bout
	Max peak amplitude (deltaF/F)
	CDM	+C21
	0.268	0.515624
	0.304679	1.25386
	0.112363	0.288165
	0.738679	0.91142
	0.048889	0.488294
Group	Mean	± SEM	n	Statistics	F test (variance)	t value	P value	Replication
CDM	0.2945	0.1207	5	Paired t test	-	t=2.713	P=0.0534	One cohorts of males and females mixed
+C21	0.6915	0.1731	5
	AUC
	CDM	+C21
	0.533969	1.09448
	0.755514	2.566
	0.188301	0.5932
	1.47261	2.40039
	-0.11508	0.936863
Group	Mean	± SEM	n	Statistics	F test (variance)	t value	P value	Replication
CDM	0.5671	0.2707	5	Paired t test	-	t=3.883	P=0.0178	One cohorts of males and females mixed
+C21	1.518	0.4031	5

## Sheet: Fig. 4e
Inhibitory neurons - Immobility bout
	Min peak amplitude (deltaF/F)
	CDM	+C21
	-0.0860557	-0.312491
	-0.0680034	-0.615594
	-0.044861	-0.149663
	-0.150083	-0.445214
Group	Mean	± SEM	n	Statistics	F test (variance)	t value	P value	Replication
CDM	-0.08725	0.02258	4	Paired t test	P=0.0516	t=3.142	P=0.0516	One cohorts of males and females mixed
+C21	-0.3807	0.09890	4
	AUC
	CDM	+C21
	-0.053596	0.0281064
	0.0972357	-0.325634
	0.0269223	-0.16202
	0.0353547	-0.616413
Group	Mean	± SEM	n	Statistics	F test (variance)	t value	P value	Replication
CDM	0.02648	0.03095	4	Paired t test	P=0.1569	t=1.879	P=0.1569	One cohorts of males and females mixed
+C21	-0.2690	0.1365	4
